# Supplementary material for: The directions of an external electric field control the catalysis of the hydroboration of C–O unsaturated compounds
Source: Royal Society of Chemistry journal article supplement (doi:10.1039/c9ra03895g), 2019-01-01
Supplement: c9ra03895g1.pdf [file c9ra03895g1.pdf]

# Directions of External Electric Field Control Catalyze the Hydroboration of C–O Unsaturated Compounds

Ming-Xia Zhang<sup>1</sup> · Hong-Liang Xu<sup>1\*</sup> · Zhong-Min Su<sup>1,2</sup>

E-mail: [hlxu@nenu.edu.cn](mailto:hlxu@nenu.edu.cn)

<sup>1</sup> Institute of Functional Material Chemistry, Department of Chemistry, National & Local United Engineering Lab for Power Battery, Northeast Normal University, Changchun 130024, Jilin, People's Republic of China

<sup>2</sup> School of Chemistry and Environmental Engineering, Changchun University of Science and Technology, Changchun, Jilin 130012, P. R. China

## List of Contents

**Table S1~S18** **Page 1~18**

**Figure S1~S8** **Page 19~26**

**Coordinates of TSs** **Page 27~42**

**Table S1.** Relative energies (kcal/mol) of reactants, transition states, and products in Markovnikov hydroboration of benzaldehyde in present of EEFs ( $10^{-4}$  au).

|                  | -150 | -100 | -75   | -50  | -25  | 25   | 50   | 75   | 100  | 150   |
|------------------|------|------|-------|------|------|------|------|------|------|-------|
| PhCHO +<br>HBPIn | 0.0  | 0.0  | 0.0   | 0.0  | 0.0  | 0.0  | 0.0  | 0.0  | 0.0  | 0.0   |
| TS2 ( $F_X$ )    | –    | –    | 88.4  | 89.0 | 89.0 | 88.4 | 87.6 | 86.6 | 85.5 | 79.5  |
| P2 ( $F_X$ )     | –    | –    | -10.7 | -8.9 | -7.4 | -4.8 | -3.7 | -3.0 | -9.0 | -14.6 |
| TS2 ( $F_Y$ )    | –    | –    | 87.5  | 87.9 | 88.4 | 89.2 | 89.6 | 90.1 | –    | –     |
| P2 ( $F_Y$ )     | –    | –    | -10.9 | -9.2 | -7.6 | -4.9 | -3.6 | -2.6 | –    | –     |
| TS2 ( $F_Z$ )    | 98.7 | 95.3 | 93.9  | 92.2 | 90.5 | 87.1 | 85.4 | 83.8 | –    | –     |
| P2 ( $F_Z$ )     | 1.7  | -1.2 | -2.6  | -3.8 | -5.0 | -7.2 | -8.2 | -9.0 | –    | –     |

**Table S2.** Relative energies (kcal/mol) of reactants, transition states, and products in Markovnikov hydroboration of benzophenone in present of EEFs ( $10^{-4}$  au).

|                               | -100  | -75  | -50  | -25  | 25   | 50   | 75   | 100  |
|-------------------------------|-------|------|------|------|------|------|------|------|
| Ph <sub>2</sub> CO +<br>HBPIn | 0.0   | 0.0  | 0.0  | 0.0  | 0.0  | 0.0  | 0.0  | 0.0  |
| TS2' ( $F_X$ )                | –     | 94.0 | 94.4 | 94.4 | 93.1 | 91.9 | 90.1 | 88.1 |
| P2' ( $F_X$ )                 | –     | 3.0  | 3.1  | 2.9  | 1.6  | 0.5  | -0.9 | -2.6 |
| TS2' ( $F_Y$ )                | –     | 93.8 | 93.8 | 93.8 | 94.1 | 94.3 | 94.5 | –    |
| P2' ( $F_Y$ )                 | –     | 2.9  | 2.8  | 3.0  | 1.6  | 0.9  | 0.1  | –    |
| TS2' ( $F_Z$ )                | 100.9 | 99.2 | 97.4 | 95.7 | 92.2 | 90.4 | 88.7 | –    |
| P2' ( $F_Z$ )                 | 7.7   | 6.3  | 4.9  | 3.6  | 1.2  | 0.1  | -0.9 | –    |

**Table S3.** Relative energies (kcal/mol) of reactants, transition states, and products in anti-Markovnikov hydroboration of benzaldehyde in present of EEFs ( $10^{-4}$  au).

|                              | -150  | -100  | -75   | -50   | -25   | 25    | 50    | 75    | 100   | 150   |
|------------------------------|-------|-------|-------|-------|-------|-------|-------|-------|-------|-------|
| PhCHO +<br>HBP <sub>in</sub> | 0.0   | 0.0   | 0.0   | 0.0   | 0.0   | 0.0   | 0.0   | 0.0   | 0.0   | 0.0   |
| TS1 ( $F_X$ )                | –     | –     | 37.4  | 37.3  | 36.4  | 32.6  | 30.2  | 27.0  | 24.2  | 14.9  |
| P1 ( $F_X$ )                 | –     | –     | -36.7 | -34.3 | -33.2 | -31.5 | -30.8 | -30.9 | -30.7 | -33.8 |
| TS1 ( $F_Y$ )                | –     | –     | 35.5  | 35.2  | 35.0  | 34.4  | 34.1  | 33.7  | –     | –     |
| P1 ( $F_Y$ )                 | –     | –     | -33.9 | -34.1 | -33.2 | -31.5 | -30.9 | -29.2 | –     | –     |
| TS1 ( $F_Z$ )                | 22.2  | 26.4  | 29.0  | 31.0  | 33.0  | 36.1  | 37.0  | 37.7  | –     | –     |
| P1 ( $F_Z$ )                 | -27.9 | -29.3 | -29.9 | -30.8 | -31.6 | -33.3 | -34.3 | -35.1 | –     | –     |

**Table S4.** Relative energies (kcal/mol) of reactants, transition states, and products in anti-Markovnikov hydroboration of benzophenone in present of EEFs ( $10^{-4}$  au).

|                               | -100  | -75   | -50   | -25   | 25    | 50    | 75    | 100   |
|-------------------------------|-------|-------|-------|-------|-------|-------|-------|-------|
| Ph <sub>2</sub> CO +<br>HBPin | 0.0   | 0.0   | 0.0   | 0.0   | 0.0   | 0.0   | 0.0   | 0.0   |
| TS1' ( $F_X$ )                | –     | 39.9  | 38.6  | 36.9  | 33.2  | 30.5  | 28.1  | 25.1  |
| P1' ( $F_X$ )                 | –     | -31.7 | -30.5 | -29.9 | -29.3 | -29.3 | -30.0 | -30.8 |
| TS1' ( $F_Y$ )                | –     | 34.7  | 35.0  | 35.1  | 35.2  | 34.9  | 34.6  | –     |
| P1' ( $F_Y$ )                 | –     | -29.6 | -42.9 | -28.5 | -30.4 | -31.2 | -32.1 | –     |
| TS1' ( $F_Z$ )                | 26.6  | 28.7  | 30.7  | 33.1  | 36.8  | 38.2  | 39.2  | –     |
| P1' ( $F_Z$ )                 | -26.5 | -27.1 | -27.9 | -28.6 | -30.4 | -31.3 | -32.2 | –     |

**Table S5.** Relative energies (kcal/mol) of reactants, transition states, and products in anti-Markovnikov hydroboration of benzaldehyde with and without EEFs ( $10^{-4}$  au) at the level of M06/6-311++G\*\*//M06/6-31G\*.

|                  | -50   | 0     | 50    |
|------------------|-------|-------|-------|
| PhCHO +<br>HBPin | 0.0   | 0.0   | 0.0   |
| TS1 ( $F_X$ )    | 31.3  | 28.9  | 24.5  |
| P1 ( $F_X$ )     | -39.6 | -37.9 | -36.1 |
| TS1 ( $F_Y$ )    | 29.5  | 28.9  | 28.2  |
| P1 ( $F_Y$ )     | -39.2 | -37.9 | -37.1 |
| TS1 ( $F_Z$ )    | 25.4  | 28.9  | 30.7  |
| P1 ( $F_Z$ )     | -36.7 | -37.9 | -39.4 |

**Table S6.** Relative energies (kcal/mol) of reactants, transition states, and products in Markovnikov hydroboration of benzaldehyde with and without EEFs ( $10^{-4}$  au) at the level of M06/6-311++G\*\*//M06/6-31G\*.

|                  | -50   | 0     | 50    |
|------------------|-------|-------|-------|
| PhCHO +<br>HBPIn | 0.0   | 0.0   | 0.0   |
| TS2 ( $F_X$ )    | 82.7  | 82.3  | 81.4  |
| P2 ( $F_X$ )     | -14.8 | -12.4 | -10.2 |
| TS2 ( $F_Y$ )    | 81.5  | 82.3  | 83.2  |
| P2 ( $F_Y$ )     | -14.9 | -12.4 | -10.1 |
| TS2 ( $F_Z$ )    | 85.6  | 82.3  | 79.1  |
| P2 ( $F_Z$ )     | -10.1 | -12.4 | -14.5 |

**Table S7.** Relative energies (kcal/mol) of reactants, transition states, and products in anti-Markovnikov hydroboration of benzaldehyde with and without EEFs ( $10^{-4}$  au) at the level of PBE0/6-311++G\*\*//PBE0/6-31G\*.

|                  | -50   | 0     | 50    |
|------------------|-------|-------|-------|
| PhCHO +<br>HBPIn | 0.0   | 0.0   | 0.0   |
| TS1 ( $F_X$ )    | 30.3  | 27.9  | 23.5  |
| P1 ( $F_X$ )     | -40.5 | -38.3 | -36.6 |
| TS1 ( $F_Y$ )    | 28.4  | 27.9  | 27.2  |
| P1 ( $F_Y$ )     | -39.8 | -38.3 | -36.9 |
| TS1 ( $F_Z$ )    | 24.4  | 27.9  | 29.6  |
| P1 ( $F_Z$ )     | -36.8 | -38.3 | -40.3 |



**Table S8.** Relative energies (kcal/mol) of reactants, transition states, and products in Markovnikov hydroboration of benzaldehyde with and without EEFs ( $10^{-4}$  au) at the level of PBE0/6-311++G\*\*//PBE0/6-31G\*.

|                  | -50   | 0     | 50    |
|------------------|-------|-------|-------|
| PhCHO +<br>HBPIn | 0.0   | 0.0   | 0.0   |
| TS2 ( $F_X$ )    | 79.8  | 79.3  | 78.2  |
| P2 ( $F_X$ )     | -16.5 | -13.9 | -11.4 |
| TS2 ( $F_Y$ )    | 78.5  | 79.3  | 80.0  |
| P2 ( $F_Y$ )     | -16.7 | -13.9 | -11.6 |
| TS2 ( $F_Z$ )    | 82.6  | 79.3  | 76.0  |
| P2 ( $F_Z$ )     | -11.7 | -13.9 | -15.9 |

**Table S9.** Relative energies (kcal/mol) of reactants, transition states, and products in anti-Markovnikov hydroboration of benzaldehyde with and without EEFs ( $10^{-4}$  au) at the level of BP86-D3/6-311++G\*\*//BP86-D3/6-31+G\*.

|                  | -50   | 0     | 50    |
|------------------|-------|-------|-------|
| PhCHO +<br>HBPIn | 0.0   | 0.0   | 0.0   |
| TS1 ( $F_X$ )    | 26.9  | 25.1  | 21.1  |
| P1 ( $F_X$ )     | -37.5 | -35.5 | -34.0 |
| TS1 ( $F_Y$ )    | 25.7  | 25.1  | 24.4  |
| P1 ( $F_Y$ )     | -37.0 | -35.5 | -34.6 |
| TS1 ( $F_Z$ )    | 22.1  | 25.1  | 26.5  |
| P1 ( $F_Z$ )     | -34.3 | -35.5 | -36.4 |

**Table S10.** Relative energies (kcal/mol) of reactants, transition states, and products in Markovnikov hydroboration of benzaldehyde with and without EEFs ( $10^{-4}$  au) at the level of BP86-D3/6-311++G\*\*//BP86-D3/6-31+G\*.

|                  | -50   | 0     | 50    |
|------------------|-------|-------|-------|
| PhCHO +<br>HBPIn | 0.0   | 0.0   | 0.0   |
| TS2 ( $F_X$ )    | 69.6  | 69.6  | 68.9  |
| P2 ( $F_X$ )     | -15.6 | -13.1 | -10.7 |
| TS2 ( $F_Y$ )    | 68.8  | 69.6  | 70.5  |
| P2 ( $F_Y$ )     | -15.3 | -13.1 | -10.9 |
| TS2 ( $F_Z$ )    | 72.8  | 69.6  | 66.4  |
| P2 ( $F_Z$ )     | -10.9 | -13.1 | -14.7 |

**Table S11.** Relative energies (kcal/mol) of reactants, transition states, and products in anti-Markovnikov hydroboration of benzaldehyde with and without EEFs ( $10^{-4}$  au) at the level of B3LYP/6-311++G\*\*//B3LYP/6-311G\*.

|                  | -50   | 0     | 50    |
|------------------|-------|-------|-------|
| PhCHO +<br>HBPIn | 0.0   | 0.0   | 0.0   |
| TS1 ( $F_X$ )    | 37.5  | 34.7  | 30.5  |
| P1 ( $F_X$ )     | -34.6 | -32.2 | -30.7 |
| TS1 ( $F_Y$ )    | 35.2  | 34.7  | 34.2  |
| P1 ( $F_Y$ )     | -34.5 | -32.2 | -30.7 |
| TS1 ( $F_Z$ )    | 31.1  | 34.7  | 37.0  |
| P1 ( $F_Z$ )     | -30.6 | -32.2 | -34.3 |

**Table S12.** Relative energies (kcal/mol) of reactants, transition states, and products in Markovnikov hydroboration of benzaldehyde with and without EEFs ( $10^{-4}$  au) at the level of B3LYP/6-311++G\*\*//B3LYP/6-311G\*.

|                  | -50  | 0    | 50   |
|------------------|------|------|------|
| PhCHO +<br>HBPIn | 0.0  | 0.0  | 0.0  |
| TS2 ( $F_X$ )    | 89.2 | 88.9 | 87.9 |
| P2 ( $F_X$ )     | -8.7 | -6.1 | -3.4 |
| TS2 ( $F_Y$ )    | 88.1 | 88.9 | 89.8 |
| P2 ( $F_Y$ )     | -9.1 | -6.1 | -3.6 |
| TS2 ( $F_Z$ )    | 92.3 | 88.9 | 85.6 |
| P2 ( $F_Z$ )     | -3.5 | -6.1 | -8.1 |

**Table S13.** Relative energies (kcal/mol) of reactants, transition states, and products in anti-Markovnikov hydroboration of benzaldehyde with and without EEFs ( $10^{-4}$  au) at the level of M06/6-311++G\*\*//M06/6-311G\*.

|                  | -50   | 0     | 50    |
|------------------|-------|-------|-------|
| PhCHO +<br>HBPIn | 0.0   | 0.0   | 0.0   |
| TS1 ( $F_X$ )    | 31.9  | 28.6  | 23.7  |
| P1 ( $F_X$ )     | -38.2 | -37.9 | -37.4 |
| TS1 ( $F_Y$ )    | 29.4  | 28.6  | 27.0  |
| P1 ( $F_Y$ )     | -39.1 | -37.9 | -37.4 |
| TS1 ( $F_Z$ )    | 25.0  | 28.6  | 30.9  |
| P1 ( $F_Z$ )     | -33.3 | -37.9 | -42.3 |

**Table S14.** Relative energies (kcal/mol) of reactants, transition states, and products in Markovnikov hydroboration of benzaldehyde with and without EEFs ( $10^{-4}$  au) at the level of M06/6-311++G\*\*//M06/6-311G\*.

|                  | -50   | 0     | 50    |
|------------------|-------|-------|-------|
| PhCHO +<br>HBPIn | 0.0   | 0.0   | 0.0   |
| TS2 ( $F_X$ )    | 82.7  | 82.4  | 81.4  |
| P2 ( $F_X$ )     | -16.0 | -12.1 | -8.7  |
| TS2 ( $F_Y$ )    | 81.2  | 82.4  | 83.4  |
| P2 ( $F_Y$ )     | -14.0 | -12.1 | -10.4 |
| TS2 ( $F_Z$ )    | 85.7  | 82.4  | 78.9  |
| P2 ( $F_Z$ )     | -13.3 | -12.1 | -11.1 |

**Table S15.** Relative energies (kcal/mol) of reactants, transition states, and products in anti-Markovnikov hydroboration of benzaldehyde with and without EEFs ( $10^{-4}$  au) at the level of PBE0/6-311++G\*\*//PBE0/6-311G\*.

|                  | -50   | 0     | 50    |
|------------------|-------|-------|-------|
| PhCHO +<br>HBPIn | 0.0   | 0.0   | 0.0   |
| TS1 ( $F_X$ )    | 30.3  | 27.8  | 23.5  |
| P1 ( $F_X$ )     | -40.7 | -38.2 | -36.5 |
| TS1 ( $F_Y$ )    | 28.4  | 27.8  | 27.2  |
| P1 ( $F_Y$ )     | -40.3 | -38.2 | -36.8 |
| TS1 ( $F_Z$ )    | 24.5  | 27.8  | 29.5  |
| P1 ( $F_Z$ )     | -36.6 | -38.2 | -40.1 |



**Table S16.** Relative energies (kcal/mol) of reactants, transition states, and products in Markovnikov hydroboration of benzaldehyde with and without EEFs ( $10^{-4}$  au) at the level of PBE0/6-311++G\*\*//PBE0/6-311G\*.

|                  | -50   | 0     | 50    |
|------------------|-------|-------|-------|
| PhCHO +<br>HBPIn | 0.0   | 0.0   | 0.0   |
| TS2 ( $F_X$ )    | 79.9  | 79.4  | 78.3  |
| P2 ( $F_X$ )     | -16.5 | -13.9 | -11.2 |
| TS2 ( $F_Y$ )    | 78.7  | 79.4  | 80.2  |
| P2 ( $F_Y$ )     | -16.6 | -13.9 | -11.4 |
| TS2 ( $F_Z$ )    | 82.7  | 79.4  | 76.1  |
| P2 ( $F_Z$ )     | -11.2 | -13.9 | -15.8 |

**Table S17.** Relative energies (kcal/mol) of reactants, transition states, and products in anti-Markovnikov hydroboration of benzaldehyde in THF solvent with and without EEFs ( $10^{-4}$  au) at the level of B3LYP/6-311++G\*\*//B3LYP/6-31G\*.

|                  | -50   | 0     | 50    |
|------------------|-------|-------|-------|
| PhCHO +<br>HBPIn | 0.0   | 0.0   | 0.0   |
| TS1 ( $F_X$ )    | 38.5  | 34.2  | 29.2  |
| P1 ( $F_X$ )     | -32.5 | -30.2 | -28.3 |
| TS1 ( $F_Y$ )    | 35.3  | 34.2  | 33.7  |
| P1 ( $F_Y$ )     | -31.0 | -30.2 | -28.7 |
| TS1 ( $F_Z$ )    | 29.0  | 34.2  | 38.1  |
| P1 ( $F_Z$ )     | -28.3 | -30.2 | -32.6 |

**Table S18.** Relative energies (kcal/mol) of reactants, transition states, and products in Markovnikov hydroboration of benzaldehyde in THF solvent with and without EEFs ( $10^{-4}$  au) at the level of B3LYP/6-311++G\*\*//B3LYP/6-31G\*.

|                  | -50  | 0    | 50   |
|------------------|------|------|------|
| PhCHO +<br>HBPIn | 0.0  | 0.0  | 0.0  |
| TS2 ( $F_X$ )    | 91.4 | 91.1 | 89.8 |
| P2 ( $F_X$ )     | -7.7 | -4.5 | -1.5 |
| TS2 ( $F_Y$ )    | 89.9 | 91.1 | 92.2 |
| P2 ( $F_Y$ )     | -7.9 | -4.5 | -1.8 |
| TS2 ( $F_Z$ )    | 95.4 | 91.1 | 86.5 |
| P2 ( $F_Z$ )     | -1.6 | -4.5 | -7.2 |

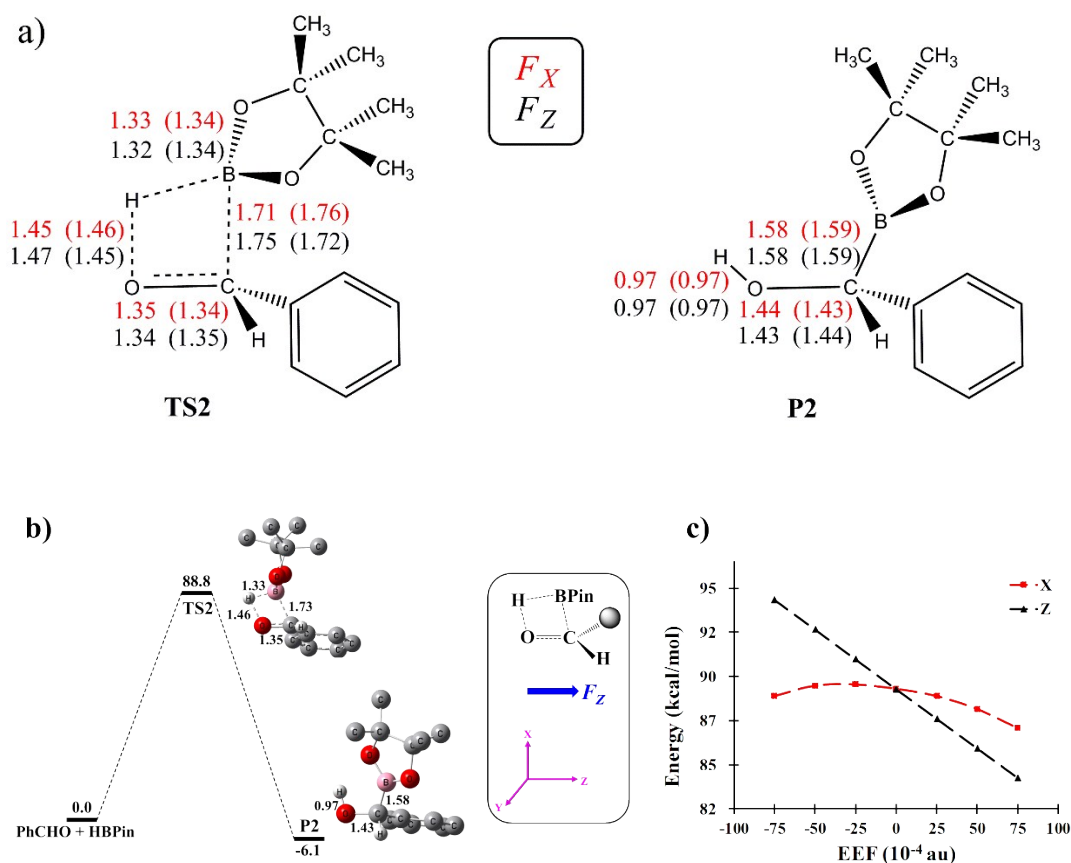

**Fig. S1** a) Structures of transition states and products in Markovnikov hydroboration of benzaldehyde with HBPin in present of EEFs ( $\pm 50 \times 10^{-4}$  au). Notes: The bond length are given in Å;  $F_X$ : the red,  $F_Z$ : the black; Values in brackets are those calculated when EEFs are oriented along negative directions; b) Reaction pathway of Markovnikov hydroboration of benzaldehyde with HBPin and the relative energies (kcal/mol) of stationary points at no EEf; c) The barrier variations of these hydroboration of benzaldehyde when EEFs are  $\pm 25$ ,  $\pm 50$  and  $\pm 75 \times 10^{-4}$  au from  $F_X$  and  $F_Z$  directions.

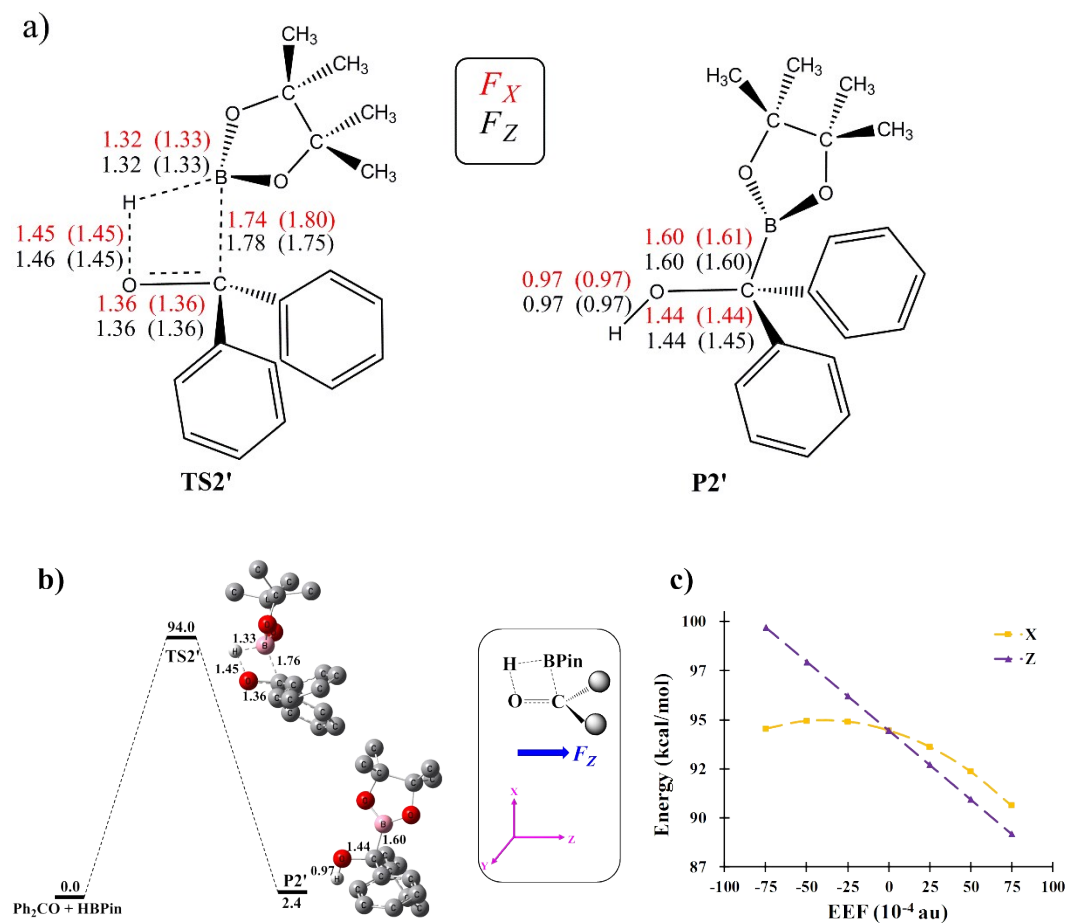

**Fig. S2** a) Structures of transition states and products in Markovnikov hydroboration of benzophenone with HBPIn in present of EEFs ( $\pm 50 \times 10^{-4}$  au). Notes: The bond length are given in Å;  $F_X$ : the red,  $F_Z$ : the black; Values in brackets are those calculated when EEFs are oriented along negative directions; b) Reaction pathway of Markovnikov hydroboration of benzophenone with HBPIn and the relative energies (kcal/mol) of stationary points at no EEF; c) The barrier variations of these hydroboration of benzophenone when EEFs are  $\pm 25$ ,  $\pm 50$  and  $\pm 75 \times 10^{-4}$  au from  $F_X$  and  $F_Z$  directions.

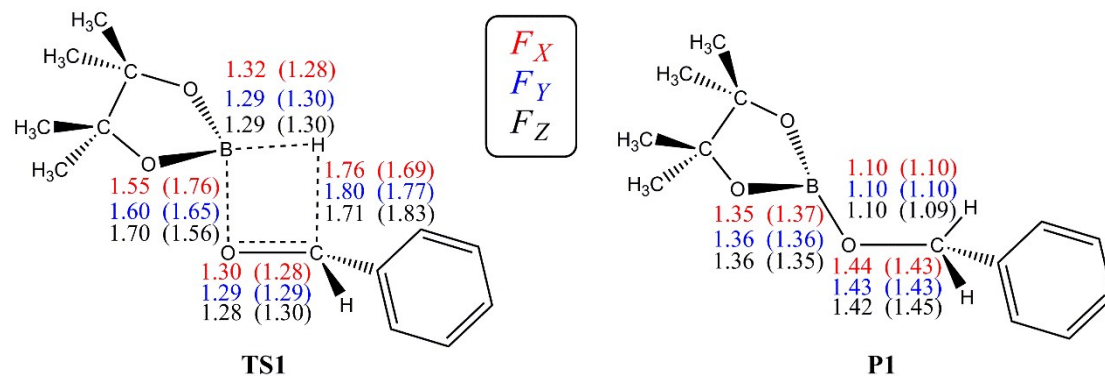

**Fig. S3** Structures of transition states, and products in anti-Markovnikov hydroboration of benzaldehyde in present of EEFs ( $\pm 50 \times 10^{-4}$  au). Notes: The bond length are given in Å;  $F_X$ : the red,  $F_Y$ : the blue,  $F_Z$ : the black; Values in brackets are those calculated when EEFs are oriented along negative directions.

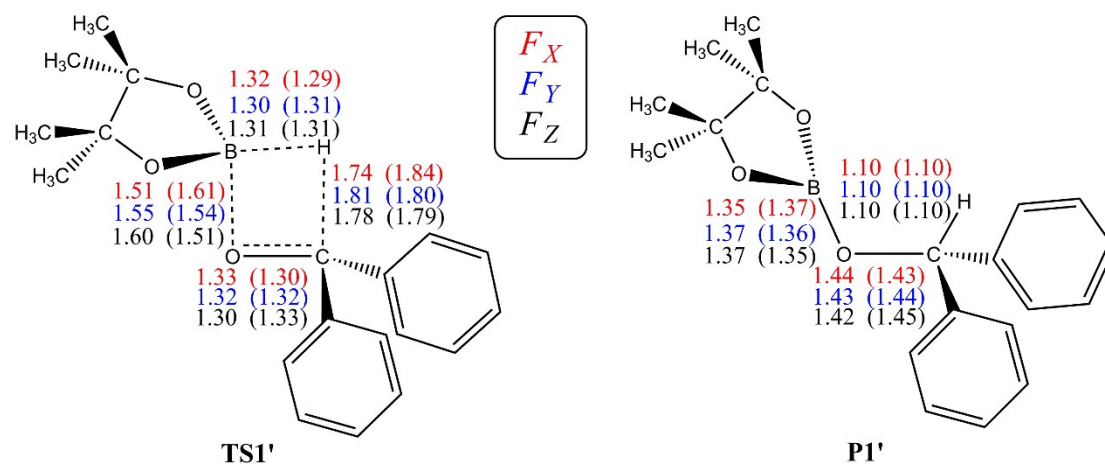

**Fig. S4** Structures of transition states, and products in anti-Markovnikov hydroboration of benzophenone in present of EEFs ( $\pm 50 \times 10^{-4}$  au). Notes: The bond length are given in Å;  $F_X$ : the red,  $F_Y$ : the blue,  $F_Z$ : the black; Values in brackets are those calculated when EEFs are oriented along negative directions.

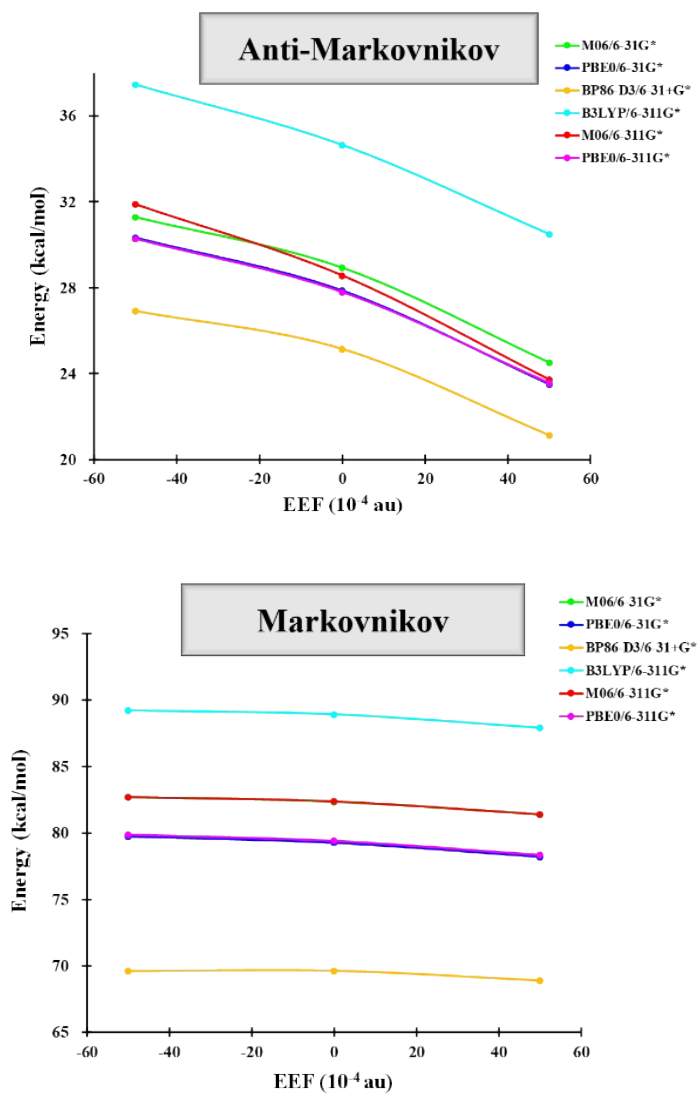

**Fig. S5.** The barriers of the hydroboration of benzaldehyde with HBPi according to the paths of anti-Markovnikov (the left) and Markovnikov (the right) addition when EEFs are 0 and  $\pm 50$  ( $\times 10^{-4}$  au) from  $F_X$  direction on the basis of several computational methods.



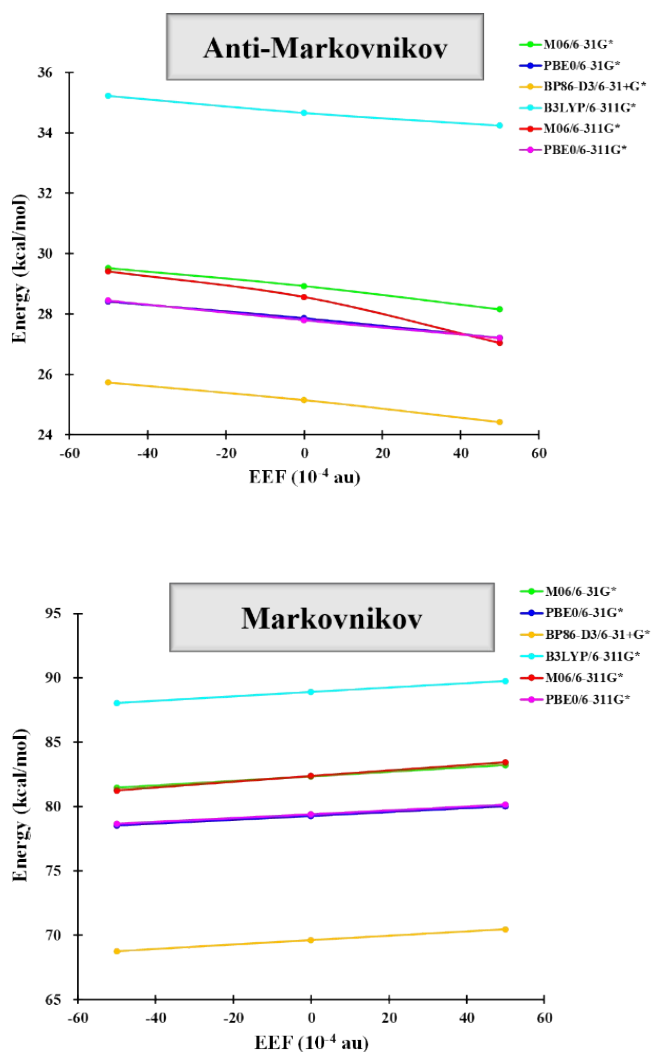

**Fig. S6.** The barriers of the hydroboration of benzaldehyde with HBPIn according to the paths of anti-Markovnikov (the left) and Markovnikov (the right) addition when EEFs are 0 and  $\pm 50$  ( $\times 10^{-4}$  au) from  $F_Y$  direction on the basis of several computational methods.

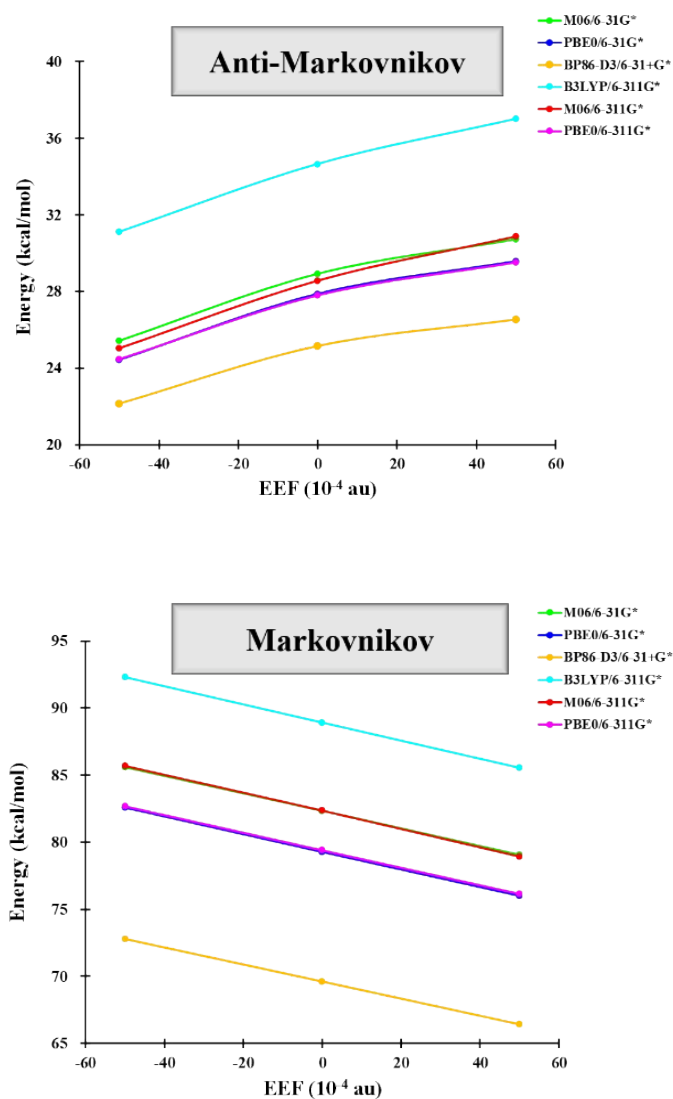

**Fig. S7.** The barriers of the hydroboration of benzaldehyde with HBPi according to the paths of anti-Markovnikov (the left) and Markovnikov (the right) addition when EEFs are 0 and  $\pm 50$  ( $\times 10^{-4}$  au) from  $F_Z$  direction on the basis of several computational methods.

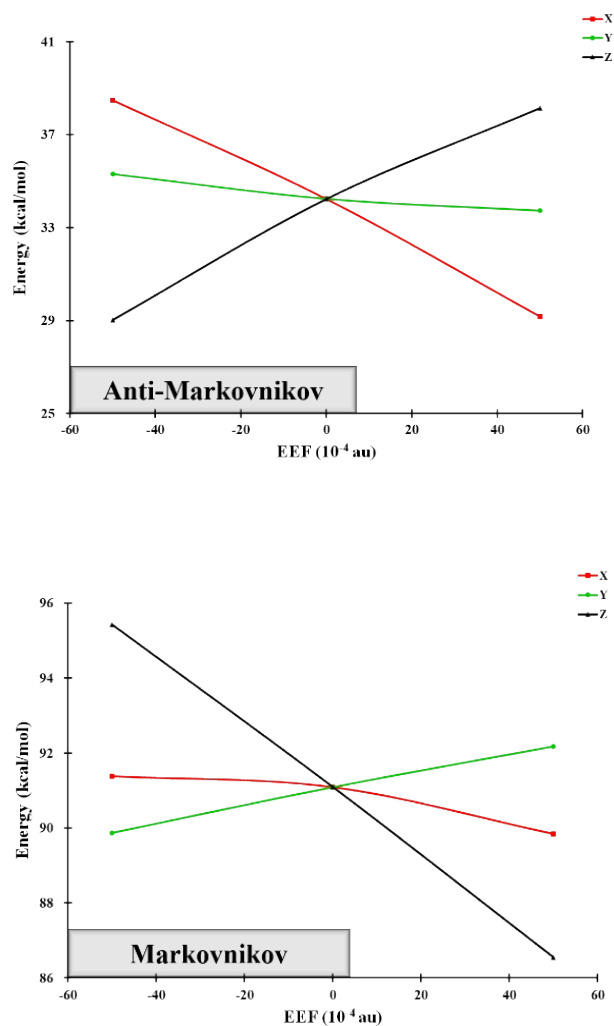

**Fig. S8.** The barriers of the hydroboration of benzaldehyde with HBPi according to the paths of anti-Markovnikov (the left) and Markovnikov (the right) addition when EEFs are 0 and  $\pm 50$  ( $\times 10^{-4}$  au) from three directions ( $F_X$ ,  $F_Y$ , and  $F_Z$ ) in THF solvent.

## The coordinates of TSs in hydroboration of benzaldehyde with HBPIn.

### TS1

Frequency = -583.3i cm<sup>-1</sup>

ZeroPoint = 0.3013689 au

E<sub>tot</sub> = -757.299778 au

C,0,-0.0114084643,0.068760849,1.2600043805  
B,0,1.6198415158,0.0595754014,-0.0050155445  
H,0,1.7754721487,-0.0527563302,1.2697192187  
O,0,-0.008657574,0.0408990143,-0.0273355206  
C,0,-0.5278034861,-1.0379343196,2.061339991  
C,0,-0.7470175291,-0.8610515544,3.4372009731  
C,0,-0.8204440504,-2.2682897723,1.4479712882  
C,0,-1.2643249658,-1.9060928215,4.1963484822  
H,0,-0.5128415905,0.0941734012,3.9013169676  
C,0,-1.3376607044,-3.3086475673,2.2113429986  
H,0,-0.6258626089,-2.3788831769,0.3862714629  
C,0,-1.5591544873,-3.1272284443,3.581662314  
H,0,-1.4384862135,-1.7744955213,5.2601167583  
H,0,-1.5662697325,-4.2630552353,1.7462940418  
H,0,-1.9620680086,-3.9439036781,4.1747292143  
O,0,2.1907385972,1.2551239067,-0.4909487494  
O,0,2.063877414,-1.0701426358,-0.7377849918  
C,0,3.152223931,-0.6060722087,-1.5643369155  
C,0,2.804958757,0.9221765206,-1.7564336215  
C,0,4.0090368262,1.8416497426,-1.9589980422  
H,0,3.6680559044,2.8776954582,-2.060366304  
H,0,4.6946708806,1.7969084105,-1.109378051  
H,0,4.560475606,1.5770966375,-2.8693878587  
C,0,4.4640527125,-0.826437776,-0.7935865787  
H,0,4.4883883366,-0.2267240948,0.1216287299  
H,0,4.5324957405,-1.8816726573,-0.5094970114  
H,0,5.3432440755,-0.5748418459,-1.3974262408  
C,0,3.1576173735,-1.4340866041,-2.850136471  
H,0,2.1863489799,-1.4007382813,-3.3490055216  
H,0,3.9242330019,-1.0755714866,-3.5476169033  
H,0,3.3791456109,-2.4803045172,-2.6130565477  
C,0,1.7694294461,1.1617554939,-2.8675001266  
H,0,1.4064461176,2.1919397436,-2.79323854  
H,0,2.1997182218,1.0193875874,-3.8655449124  
H,0,0.9113079343,0.4922713603,-2.7580119237  
H,0,0.1135114133,1.026982732,1.7855585955

### TS2

Frequency = -1233.8i cm<sup>-1</sup>

ZeroPoint = 0.299 au

E<sub>tot</sub> = -757.2134878 au

C,0,0.0149069592,-0.0314163456,1.3550848669  
B,0,1.5998788016,0.0940494901,0.6631475555  
H,0,1.3218747963,-0.1411868382,-0.6173511431  
O,0,0.0138244438,0.016867121,0.0097849242  
C,0,-0.3461132448,-1.2608576242,2.071852775  
C,0,-0.573976215,-2.4768332878,1.407257514  
C,0,-0.4536160365,-1.2177400273,3.4718451335  
C,0,-0.9080151402,-3.6186899457,2.1301868344  
H,0,-0.4914729247,-2.5145769986,0.3257290997  
C,0,-0.79245231,-2.3616960249,4.1906015213  
H,0,-0.2764778433,-0.2800263338,3.9940782447  
C,0,-1.0195987899,-3.5672754192,3.5227051391  
H,0,-1.0853950602,-4.5537692699,1.6054072273  
H,0,-0.8776790818,-2.3129153724,5.2729307619  
H,0,-1.2825855553,-4.4604493577,4.0828039091  
O,0,2.2389264928,1.3535634871,0.7492202385  
O,0,2.4442316719,-0.9975998897,1.0151250061  
C,0,3.5869831862,1.0638165122,1.2008252675  
C,0,3.7760812321,-0.459270223,0.8109660044  
C,0,4.5411848325,2.0320014895,0.5031348502  
H,0,5.5835848722,1.8139840248,0.7635994426  
H,0,4.4342317165,1.986808456,-0.5831906926  
H,0,4.3209551157,3.0569218963,0.8195136741  
C,0,3.6156128497,1.2895934103,2.7199921819  
H,0,3.2603350104,2.3029213273,2.9324128469  
H,0,2.9597143211,0.5809055618,3.2353641395  
H,0,4.6266022591,1.186874637,3.1293679592  
C,0,4.7243911134,-1.2442393998,1.7166081147  
H,0,5.7371877146,-0.8266560823,1.6777948781  
H,0,4.3805408303,-1.2398984489,2.7530221679  
H,0,4.7731853504,-2.2856726576,1.3824330833  
C,0,4.1719141348,-0.6566106793,-0.6596407271  
H,0,5.2039460029,-0.3419335884,-0.8467977499  
H,0,4.083814305,-1.7181612454,-0.9117245471  
H,0,3.519880849,-0.0913256224,-1.3350695754  
H,0,-0.1309816996,0.9368939087,1.8393667938

$F_X = 50 (10^{-4}) \text{ au}$

**TS1**

**Frequency = -604.5i cm<sup>-1</sup>**

**ZeroPoint = 0.3013537 au**

**E<sub>tot</sub> = -757.3068589 au**

C,0,0.01068462,0.04041791,1.29084367  
B,0,1.56711962,0.05137491,-0.03310533  
H,0,1.76745262,-0.08846209,1.25990067  
O,0,0.02102762,-0.01396809,-0.01262633  
C,0,-0.57353338,-1.01623309,2.09801067  
C,0,-0.80328638,-0.79595909,3.46846067  
C,0,-0.96185438,-2.22966309,1.49997667  
C,0,-1.42214338,-1.77768909,4.23382067  
H,0,-0.51003438,0.14965491,3.91842067  
C,0,-1.58436638,-3.20493909,2.26976467  
H,0,-0.77738638,-2.37191609,0.44041967  
C,0,-1.81415838,-2.97889809,3.63240367  
H,0,-1.61680938,-1.60787609,5.28835367  
H,0,-1.90369038,-4.13711309,1.81386567  
H,0,-2.31188938,-3.73968009,4.22727767  
O,0,2.12845062,1.28064891,-0.48263633  
O,0,2.08915962,-1.04030109,-0.79026333  
C,0,3.13856162,-0.50951309,-1.61265133  
C,0,2.72263562,1.00587591,-1.76315733  
C,0,3.88107562,1.98286891,-1.97435533  
H,0,3.48980162,3.00393091,-2.04039033  
H,0,4.58988662,1.94865991,-1.14237833  
H,0,4.41829762,1.76585191,-2.90646733  
C,0,4.47246562,-0.68614909,-0.86435133  
H,0,4.47784862,-0.10450309,0.06289867  
H,0,4.59110562,-1.74351009,-0.60364233  
H,0,5.33219662,-0.38094509,-1.47409733  
C,0,3.16622362,-1.30437509,-2.92025133  
H,0,2.18646162,-1.30486109,-3.40231633  
H,0,3.90253062,-0.89081709,-3.62125833  
H,0,3.43833562,-2.34571309,-2.71432733  
C,0,1.65533662,1.22217691,-2.85007833  
H,0,1.24385262,2.23069091,-2.74279533  
H,0,2.06902462,1.12373891,-3.86075033  
H,0,0.83098562,0.51223691,-2.74041033  
H,0,0.14463762,1.01117691,1.78535267

**TS2**

**Frequency = -1258.4i cm<sup>-1</sup>**

**ZeroPoint = 0.2991155 au**

**E<sub>tot</sub> = -757.2133209 au**

C,0,0.0374206568,-0.0601729874,1.352570051  
B,0,1.6046477489,0.0742711724,0.6774084032  
H,0,1.3470240924,-0.163314434,-0.6043298017  
O,0,0.0372510607,-0.0186645644,0.0037440507  
C,0,-0.3342005918,-1.2882454439,2.0718239639  
C,0,-0.6138864555,-2.4916580435,1.4053376659  
C,0,-0.4182794431,-1.2441687126,3.4731140222  
C,0,-0.9808452864,-3.6226555175,2.129623338  
H,0,-0.5639182808,-2.5249583013,0.3216286166  
C,0,-0.7899203005,-2.3770891451,4.1930665747  
H,0,-0.2141553902,-0.311345676,3.9943696928  
C,0,-1.0712906786,-3.5704104966,3.5236962473  
H,0,-1.2160976582,-4.5444561361,1.6048209548  
H,0,-0.8734122567,-2.3261763387,5.2751937167  
H,0,-1.3756107096,-4.450394007,4.0832711368  
O,0,2.2473865757,1.3438554196,0.7573591436  
O,0,2.480149358,-1.0026414452,1.0348128599  
C,0,3.5903629806,1.0709701102,1.2009155007  
C,0,3.7940404201,-0.4518412622,0.8167173245  
C,0,4.5325494713,2.0482305118,0.495360069  
H,0,5.5800377892,1.8448164772,0.7521856896  
H,0,4.4192284265,1.9972373475,-0.5902439656  
H,0,4.2980008251,3.0714599599,0.8074695196  
C,0,3.6296877252,1.3015677087,2.7207021842  
H,0,3.2585162794,2.3092054103,2.9326055529  
H,0,2.9858568992,0.5859114154,3.2409503441  
H,0,4.6454051368,1.2144913385,3.1250706252  
C,0,4.7631896467,-1.2211591173,1.7160040683  
H,0,5.7716723772,-0.7915729529,1.6655112287  
H,0,4.4278837586,-1.215781187,2.7552442691  
H,0,4.8182601483,-2.2643347986,1.3868002475  
C,0,4.1848054191,-0.6483359317,-0.6576015733  
H,0,5.2132629948,-0.3234477297,-0.8532409077  
H,0,4.1023694437,-1.7111812243,-0.9071022409  
H,0,3.5215529055,-0.0917889981,-1.3284189233  
H,0,-0.1435210885,0.9101785794,1.8219473509

$$F_X = -50 (10^{-4}) \text{ au}$$

**TS1**

$$\text{Frequency} = -656.1i \text{ cm}^{-1}$$

$$\text{ZeroPoint} = 0.3015401 \text{ au}$$

$$E_{\text{tot}} = -757.2994895 \text{ au}$$

C,0,0.0057779681,-0.0220852759,1.2388930409  
B,0,1.7430585447,-0.0321373808,0.1714067747  
H,0,1.6830567078,-0.0491218124,1.4467656014  
O,0,-0.0040136022,-0.0045754302,-0.0397758198  
C,0,-0.3859900291,-1.2196353439,2.0168785968  
C,0,-0.6902607369,-1.1007240408,3.3789076079  
C,0,-0.4533624536,-2.4689075289,1.383035211  
C,0,-1.0677409122,-2.2263680872,4.1082366107  
H,0,-0.6198788892,-0.1292601625,3.8636776675  
C,0,-0.8257125254,-3.5916324286,2.1162594269  
H,0,-0.1817893979,-2.534612331,0.3345308318  
C,0,-1.1333195107,-3.4708093277,3.4758189672  
H,0,-1.2942057434,-2.1386687082,5.1672370779  
H,0,-0.8602146189,-4.5655624617,1.6360478312  
H,0,-1.4104870236,-4.3527640501,4.047743541  
O,0,2.3577409331,1.1122040296,-0.321992706  
O,0,2.1829499765,-1.2176511392,-0.424669004  
C,0,3.3430517891,-0.8404797896,-1.2228225788  
C,0,3.0655117819,0.6855823915,-1.5231374923  
C,0,4.3129577151,1.5528610464,-1.6700803493  
H,0,4.0212417016,2.5920901101,-1.8544751503  
H,0,4.9268592107,1.5323403783,-0.7672536763  
H,0,4.925766103,1.2199076059,-2.515483108  
C,0,4.5917223901,-1.0660003562,-0.3600202881  
H,0,4.5897704864,-0.4184159093,0.5223034866  
H,0,4.6027032413,-2.1053173905,-0.0171772638  
H,0,5.5138794561,-0.8819128108,-0.9204688645  
C,0,3.3856966585,-1.7440427283,-2.453662992  
H,0,2.4475250333,-1.7073993901,-3.0132127237  
H,0,4.2057632907,-1.4560102474,-3.1210277027  
H,0,3.5563037952,-2.7799121305,-2.1426345318  
C,0,2.124266582,0.9016983956,-2.7172088219  
H,0,1.8097427643,1.9502834698,-2.730918781  
H,0,2.621535286,0.6801181498,-3.6677962245  
H,0,1.2286128577,0.2783534574,-2.6348471269  
H,0,-0.02916557,0.9268809475,1.8032291024

**TS2**

$$\text{Frequency} = -1215.0i \text{ cm}^{-1}$$

$$\text{ZeroPoint} = 0.298664 \text{ au}$$

$$E_{\text{tot}} = -757.2193468 \text{ au}$$

C,0,-0.0009635033,-0.0166612244,1.3732383601  
B,0,1.6074562758,0.1067253551,0.6606544633  
H,0,1.2992487618,-0.1392896513,-0.6154673939  
O,0,0.000566616,0.0436409054,0.0306141063  
C,0,-0.3616801037,-1.2471017113,2.0804513201  
C,0,-0.5525102489,-2.4683993788,1.4114983652  
C,0,-0.4976796635,-1.212097004,3.4791112406  
C,0,-0.8742581383,-3.6188212084,2.1261385215  
H,0,-0.4333563422,-2.5052195651,0.3333869254  
C,0,-0.8243299289,-2.3647780481,4.1893367909  
H,0,-0.3359674154,-0.2753298594,4.0080489679  
C,0,-1.013647413,-3.5743799266,3.5165004945  
H,0,-1.0052141665,-4.559516712,1.5969873932  
H,0,-0.9152091656,-2.3221910053,5.2718089117  
H,0,-1.2515240905,-4.4778224091,4.071902563  
O,0,2.2345989932,1.3594853633,0.74482673  
O,0,2.4273264032,-0.992921532,1.0080849016  
C,0,3.5936845237,1.0636831304,1.1967922714  
C,0,3.7745051432,-0.4603546869,0.807194605  
C,0,4.548178613,2.0255921243,0.4946346735  
H,0,5.5892979429,1.8019092246,0.7518632063  
H,0,4.4398509291,1.9796473712,-0.5913489697  
H,0,4.3375318541,3.052115096,0.8117090065  
C,0,3.6203865367,1.2931612628,2.7137213549  
H,0,3.2764838125,2.3110068224,2.923575018  
H,0,2.9600756641,0.5904278699,3.2324252576  
H,0,4.6302407201,1.1832304644,3.1216683695  
C,0,4.7118455923,-1.2511848412,1.7170265318  
H,0,5.7265702525,-0.8401062254,1.6808412317  
H,0,4.3665312557,-1.243935542,2.7529022608  
H,0,4.7584758795,-2.2922621939,1.3828195352  
C,0,4.1669604476,-0.6635908786,-0.661252059  
H,0,5.1991800711,-0.3523433284,-0.8484508647  
H,0,4.0796206095,-1.725756628,-0.9099749393  
H,0,3.5173191274,-0.0978417711,-1.3396346528  
H,0,-0.1041718451,0.9476813417,1.8747525022

$F_Y = 50 (10^{-4})$  au

**TS1**

**Frequency = -568.2i cm<sup>-1</sup>**

**ZeroPoint = 0.3012769 au**

**E<sub>tot</sub> = -757.305756 au**

C,0,0.0071842202,-0.0135852937,1.2505821773  
B,0,1.5896453076,-0.070687773,-0.0771567659  
H,0,1.8082395805,0.0293017841,1.1911732323  
O,0,-0.0107586657,0.0226632293,-0.0428576696  
C,0,-0.3874886958,-1.184552941,2.0126685335  
C,0,-0.6301408411,-1.0641267267,3.3936996877  
C,0,-0.5371810445,-2.4294172796,1.3708940766  
C,0,-1.0326263386,-2.1742893503,4.1258002307  
H,0,-0.5025660237,-0.0988200639,3.8793711725  
C,0,-0.9358516744,-3.5365073624,2.1107436854  
H,0,-0.3119944707,-2.5024669087,0.3124678689  
C,0,-1.184541659,-3.4088108042,3.4826161206  
H,0,-1.2245013145,-2.0894026286,5.1912425398  
H,0,-1.0473558634,-4.5024213442,1.6282028271  
H,0,-1.4926613319,-4.2787620022,4.0557126439  
O,0,2.2199848626,0.9713827664,-0.808022855  
O,0,1.9412035183,-1.3447092172,-0.5978220919  
C,0,3.0448353312,-1.1313520182,-1.4969409759  
C,0,2.786453695,0.3475565269,-1.9842875547  
C,0,4.042238632,1.1249602136,-2.3792081871  
H,0,3.7680815372,2.1427517051,-2.6815836543  
H,0,4.7429474734,1.1967211093,-1.5438249175  
H,0,4.5524271666,0.6463293294,-3.2237209878  
C,0,4.3518408623,-1.2764236514,-0.6989682877  
H,0,4.4311428105,-0.5064609346,0.0756374539  
H,0,4.3551085957,-2.2537371405,-0.2068392749  
H,0,5.2364505218,-1.2159874824,-1.3430967325  
C,0,2.984571744,-2.1982317099,-2.5905354229  
H,0,2.0091164039,-2.2142403165,-3.0822903842  
H,0,3.7591148014,-2.034607859,-3.3493565871  
H,0,3.1518539176,-3.1860718807,-2.149490941  
C,0,1.7450190909,0.4226575685,-3.1131488388  
H,0,1.4507122323,1.4687424752,-3.2545533134  
H,0,2.1406267414,0.0427194767,-4.062045728  
H,0,0.8494509614,-0.1501164644,-2.8566085051  
H,0,0.0623597151,0.9307071387,1.8137204554

**TS2**

**Frequency = -1242.8i cm<sup>-1</sup>**

**ZeroPoint = 0.2989837 au**

**E<sub>tot</sub> = -757.216969 au**

C,0,0.0092342676,-0.0262885233,1.3607802691  
B,0,1.5904539851,0.1066223007,0.6950634474  
H,0,1.335734976,-0.1366279906,-0.5903584455  
O,0,0.0182833625,0.0422832808,0.0134867425  
C,0,-0.3569897718,-1.2627098603,2.0643513134  
C,0,-0.5828655142,-2.4727189464,1.388276912  
C,0,-0.4589954577,-1.2320020177,3.4651562808  
C,0,-0.9088881639,-3.6229533171,2.101799589  
H,0,-0.5012759626,-2.50352526,0.3064522702  
C,0,-0.7909342825,-2.3837534738,4.1744294724  
H,0,-0.2791041537,-0.2985768009,3.9955778445  
C,0,-1.0147167077,-3.583982561,3.495367396  
H,0,-1.0808361613,-4.5550756447,1.5714381765  
H,0,-0.8698543514,-2.3489917953,5.2576794334  
H,0,-1.2672673653,-4.4846227173,4.0471570542  
O,0,2.2369856569,1.3719908463,0.7785195296  
O,0,2.4364802322,-0.9775997124,1.0590626666  
C,0,3.5902945718,1.0743604529,1.203732302  
C,0,3.7676104171,-0.4563164433,0.8322949782  
C,0,4.538273638,2.0265142169,0.4738600665  
H,0,5.5840620954,1.8061692063,0.718613646  
H,0,4.4120882886,1.9610413571,-0.6095253768  
H,0,4.3282783829,3.0589747228,0.7768903022  
C,0,3.6526859273,1.3212654962,2.7190089652  
H,0,3.3096868004,2.3413483608,2.9248571224  
H,0,2.9997156305,0.6254288998,3.2542375009  
H,0,4.6698468455,1.2115407876,3.111112378  
C,0,4.7192501274,-1.235677855,1.7399306637  
H,0,5.735406491,-0.8272770489,1.6869536045  
H,0,4.3842710561,-1.2188716372,2.7790765681  
H,0,4.7576205762,-2.2809615452,1.4192086197  
C,0,4.1496773192,-0.6786545832,-0.6385000424  
H,0,5.1825974353,-0.3748424532,-0.839325435  
H,0,4.0542581252,-1.7432680689,-0.871360336  
H,0,3.4939175768,-0.1231188072,-1.3192654202  
H,0,-0.1495618926,0.9372781347,1.8523469408

$F_Y = -50 (10^{-4}) \text{ au}$

**TS1**

**Frequency = -628.5i cm<sup>-1</sup>**

**ZeroPoint = 0.3014455 au**

**E<sub>tot</sub> = -757.2989157 au**

C,0,0.0019916425,0.0418014878,1.2465917736  
B,0,1.6602636026,0.1022198019,0.063143918  
H,0,1.750623062,-0.1954355349,1.3241435758  
O,0,0.0217270461,-0.0462033752,-0.0363445159  
C,0,-0.5994300235,-1.0028591037,2.0861693353  
C,0,-0.8008027701,-0.769827856,3.4543711684  
C,0,-1.0000249133,-2.2173251564,1.5079226878  
C,0,-1.401846653,-1.7476573083,4.2436386396  
H,0,-0.4917486894,0.1764552086,3.8913997002  
C,0,-1.6036152796,-3.1889494277,2.2988161239  
H,0,-0.8311134694,-2.3642031375,0.4460632199  
C,0,-1.8027840487,-2.9545249922,3.6642916611  
H,0,-1.5643545244,-1.5674847249,5.302148778  
H,0,-1.9235047882,-4.1285974066,1.8559027746  
H,0,-2.2779117508,-3.7147953151,4.2796144407  
O,0,2.1289955274,1.4013860352,-0.1718103793  
O,0,2.2331147718,-0.8473184538,-0.8127012725  
C,0,3.283023327,-0.1386058241,-1.5196091595  
C,0,2.8005089323,1.364615202,-1.4532307979  
C,0,3.9178453651,2.4065735974,-1.4375968601  
H,0,3.4839139376,3.4084159427,-1.362312542  
H,0,4.586134774,2.2686088365,-0.5843342234  
H,0,4.5098131626,2.3663006391,-2.3595535445  
C,0,4.5999850183,-0.3752626356,-0.7644924143  
H,0,4.555344395,0.0488499101,0.2430831154  
H,0,4.7668947563,-1.4545902933,-0.6740855197  
H,0,5.4566775075,0.0649134198,-1.2864529019  
C,0,3.3754960435,-0.7209508565,-2.9299261162  
H,0,2.4099412977,-0.6809202541,-3.4389058364  
H,0,4.1114318349,-0.1752065247,-3.5320756695  
H,0,3.6900812721,-1.7698975964,-2.8775669364  
C,0,1.7716742039,1.7160641559,-2.5399786801  
H,0,1.3238643284,2.6842445288,-2.2970490997  
H,0,2.2352315674,1.794605201,-3.5297166848  
H,0,0.967634965,0.9751818167,-2.5855409783  
H,0,0.1554454493,1.0171964434,1.7301587904

**TS2**

**Frequency = -1227.7i cm<sup>-1</sup>**

**ZeroPoint = 0.2988425 au**

**E<sub>tot</sub> = -757.2152293 au**

C,0,0.018096727,-0.033148683,1.3578524719  
B,0,1.6085508516,0.0867010375,0.6398016679  
H,0,1.3048387004,-0.1394074634,-0.6354846359  
O,0,0.0085945589,-0.0003265779,0.0143293944  
C,0,-0.3382883646,-1.2580010954,2.0820308522  
C,0,-0.5585511886,-2.47978898,1.4243584848  
C,0,-0.4601510197,-1.2074538137,3.4810384367  
C,0,-0.8992752845,-3.6170915797,2.1511415926  
H,0,-0.4684069116,-2.5209556211,0.3435552016  
C,0,-0.8048670758,-2.3473251184,4.2035025968  
H,0,-0.2934190173,-0.2660832923,3.9989987098  
C,0,-1.0251772794,-3.558006067,3.5422013058  
H,0,-1.0745034599,-4.554793892,1.6280870654  
H,0,-0.9036168856,-2.2879146544,5.2842626457  
H,0,-1.2977678339,-4.4467733329,4.1063959912  
O,0,2.2418011433,1.3395416444,0.727254213  
O,0,2.4499790946,-1.0128533074,0.9791200342  
C,0,3.5868986608,1.0564708215,1.1971539916  
C,0,3.7831827523,-0.4616307248,0.7935338981  
C,0,4.5442422611,2.0357677719,0.5214954409  
H,0,5.5842329745,1.819918208,0.7930705132  
H,0,4.4504780748,2.0055309259,-0.566415357  
H,0,4.3169556784,3.0553991738,0.8466907459  
C,0,3.5922562548,1.2673313476,2.7182355245  
H,0,3.2306987594,2.2766534365,2.9350065739  
H,0,2.9335913146,0.5510446264,3.2206082639  
H,0,4.5989069812,1.1686524863,3.138988966  
C,0,4.7276502954,-1.2519589381,1.6980890054  
H,0,5.7381231272,-0.8285396817,1.6702948718  
H,0,4.3767024262,-1.2558526324,2.7322074803  
H,0,4.7832926199,-2.2909222898,1.3539787074  
C,0,4.1892095608,-0.6406923238,-0.6764687026  
H,0,5.2202681024,-0.3177836466,-0.8535222598  
H,0,4.1063081509,-1.70006618,-0.9429915621  
H,0,3.5401021655,-0.0677759577,-1.3474831496  
H,0,-0.115512915,0.9385353738,1.8374680201



$F_z = 50 (10^{-4}) \text{ au}$

**TS1**

**Frequency = -675.6i cm<sup>-1</sup>**

**ZeroPoint = 0.3013763 au**

**E<sub>tot</sub> = -757.2966758 au**

C,0,0.00551056,-0.0271821,1.26107053  
B,0,1.68729156,-0.0628961,0.11914053  
H,0,1.70811156,-0.0748311,1.40993953  
O,0,-0.00019744,0.0276009,-0.01739947  
C,0,-0.42096244,-1.2375681,1.99425453  
C,0,-0.72989844,-1.1585431,3.35847053  
C,0,-0.54671244,-2.4546201,1.30785953  
C,0,-1.17081744,-2.2919471,4.03731153  
H,0,-0.63042444,-0.2071901,3.87745253  
C,0,-0.98390044,-3.5857671,1.99135653  
H,0,-0.28368744,-2.4885831,0.25578453  
C,0,-1.29717644,-3.5040461,3.35206753  
H,0,-1.41973944,-2.2329621,5.09395253  
H,0,-1.08239544,-4.5308111,1.46544353  
H,0,-1.64315844,-4.3896141,3.87953853  
O,0,2.33121256,1.0519929,-0.41646947  
O,0,2.08576956,-1.2754201,-0.46638247  
C,0,3.13006956,-0.9324571,-1.42094347  
C,0,2.85342756,0.5978809,-1.70215447  
C,0,4.09125356,1.4303589,-2.02720747  
H,0,3.80119756,2.4742129,-2.18484747  
H,0,4.82223256,1.4008839,-1.21529247  
H,0,4.57102356,1.0742029,-2.94564547  
C,0,4.47799156,-1.1790471,-0.72750047  
H,0,4.60148056,-0.5187331,0.13734053  
H,0,4.50919556,-2.2154431,-0.37528747  
H,0,5.32158056,-1.0228461,-1.40830647  
C,0,2.98702156,-1.8475041,-2.63542947  
H,0,1.98387356,-1.7922671,-3.06294047  
H,0,3.71212956,-1.5849151,-3.41386847  
H,0,3.17231356,-2.8858791,-2.34029547  
C,0,1.77167556,0.8265019,-2.76739447  
H,0,1.47869656,1.8807839,-2.75312747  
H,0,2.13877456,0.5880179,-3.77099747  
H,0,0.87924156,0.2256499,-2.57228747  
H,0,-0.00010644,0.9053309,1.85206853

**TS2**

**Frequency = -1191.2i cm<sup>-1</sup>**

**ZeroPoint = 0.2988977 au**

**E<sub>tot</sub> = -757.2141945 au**

C,0,0.0151028194,-0.0349875631,1.3901613637  
B,0,1.6112054537,0.1000903784,0.6922459587  
H,0,1.3430853928,-0.1395381885,-0.5826154048  
O,0,0.0300667787,0.0253388926,0.0499327513  
C,0,-0.3569439539,-1.2698046827,2.0894688374  
C,0,-0.5513377244,-2.4839337196,1.4097415705  
C,0,-0.5164265885,-1.2378317811,3.4848385163  
C,0,-0.9034826579,-3.6329805184,2.1122148825  
H,0,-0.4309283372,-2.5147944146,0.331882375  
C,0,-0.8734751643,-2.3891592655,4.1829959282  
H,0,-0.3670138491,-0.3005622093,4.017332056  
C,0,-1.0674490329,-3.5921800642,3.5000587902  
H,0,-1.0554441424,-4.5639418979,1.5729244002  
H,0,-1.0015514878,-2.347029618,5.2625596265  
H,0,-1.347321406,-4.4916798914,4.0425525528  
O,0,2.2422117701,1.3609047151,0.7943788463  
O,0,2.4546697921,-0.9865185651,1.0619212376  
C,0,3.6047355579,1.0758868787,1.1988156444  
C,0,3.7845673228,-0.4527935198,0.8211688428  
C,0,4.53543466,2.036204507,0.4601040001  
H,0,5.5861975163,1.8235978571,0.6901881547  
H,0,4.3965679041,1.9760325602,-0.6211592852  
H,0,4.3218556933,3.0656272613,0.7666854164  
C,0,3.6792226402,1.3210376553,2.7146938104  
H,0,3.3319659194,2.3386086354,2.9220162388  
H,0,3.0354870518,0.6200404995,3.256332658  
H,0,4.7024321074,1.2211493832,3.0947586173  
C,0,4.7483389005,-1.2291049022,1.7187006888  
H,0,5.7603447163,-0.8125852664,1.6560117232  
H,0,4.4224364874,-1.2142896645,2.7616824029  
H,0,4.7911156041,-2.2730263388,1.3921645452  
C,0,4.1538293996,-0.6686687285,-0.6524167976  
H,0,5.1814626643,-0.3552567839,-0.8621617076  
H,0,4.062938518,-1.7325869713,-0.8916082982  
H,0,3.4925654997,-0.1134963995,-1.3268039641  
H,0,-0.1210418256,0.9286327307,1.8866200216

$F_z = -50 (10^{-4}) \text{ au}$

**TS1**

**Frequency = -499.3i cm<sup>-1</sup>**

**ZeroPoint = 0.3015628 au**

**E<sub>tot</sub> = -757.3101873 au**

C,0,0.045300239,-0.018263824,1.2888937171  
B,0,1.5691585312,0.0623927871,-0.117486367  
H,0,1.8648961448,-0.1570080861,1.1259686023  
O,0,0.0181151714,-0.0440133125,-0.0133500881  
C,0,-0.5167758537,-1.0773449029,2.0974889142  
C,0,-0.6667920658,-0.8829485579,3.4844051019  
C,0,-0.9254288601,-2.2877136583,1.5031095154  
C,0,-1.2280408938,-1.8845318793,4.2688214428  
H,0,-0.34300339,0.0510916884,3.9366290898  
C,0,-1.4876318154,-3.2819631178,2.2919152978  
H,0,-0.7851638117,-2.4160055853,0.4348968288  
C,0,-1.6377403844,-3.0810221237,3.671042345  
H,0,-1.3463084463,-1.7405845503,5.3380084081  
H,0,-1.805764421,-4.2192774762,1.8448509915  
H,0,-2.0732739243,-3.8642307162,4.2851997637  
O,0,2.0681636169,1.3348075686,-0.5312497742  
O,0,2.0543416213,-0.95869662,-0.9926091202  
C,0,3.2236403008,-0.4071190335,-1.6144321831  
C,0,2.8580139824,1.1281107774,-1.7096177067  
C,0,4.0532620192,2.0833351294,-1.6677361251  
H,0,3.6979981064,3.119073336,-1.7075400235  
H,0,4.6237570774,1.9639574627,-0.7440308973  
H,0,4.7259300065,1.9207287318,-2.5197969356  
C,0,4.4398386202,-0.6750527374,-0.7106459721  
H,0,4.3410204129,-0.161430504,0.2499495702  
H,0,4.4997534775,-1.7498399193,-0.5106231843  
H,0,5.3796622106,-0.3573058146,-1.1769157511  
C,0,3.4195486895,-1.1110710424,-2.9600735119  
H,0,2.5167802546,-1.0533647619,-3.5739785943  
H,0,4.2561175508,-0.6713151521,-3.5178921273  
H,0,3.6448520044,-2.1696587062,-2.7896124123  
C,0,1.973746147,1.450857176,-2.9281848967  
H,0,1.5710657425,2.4622818758,-2.8088247102  
H,0,2.5345663988,1.4102582009,-3.871061678  
H,0,1.1304252998,0.7560890693,-2.9889573131  
H,0,0.2567595204,0.9278063185,1.8008256236

**TS2**

**Frequency = -1279.5i cm<sup>-1</sup>**

**ZeroPoint = 0.298949 au**

**E<sub>tot</sub> = -757.2177882 au**

C,0,0.0169351831,-0.0295258482,1.3163809142  
B,0,1.5899186169,0.0858417594,0.626619137  
H,0,1.2959869389,-0.1444769515,-0.6606055535  
O,0,-0.0038983723,0.0052030486,-0.0343868103  
C,0,-0.3315665859,-1.2516461546,2.0534586429  
C,0,-0.6028054701,-2.4687933481,1.4082249992  
C,0,-0.3770752924,-1.1963722924,3.4568509776  
C,0,-0.9186542688,-3.6009531188,2.1543961887  
H,0,-0.5672187054,-2.5144498538,0.3238437371  
C,0,-0.6977659041,-2.3305674097,4.1990295862  
H,0,-0.1657106513,-0.2587071773,3.9657208582  
C,0,-0.9679296935,-3.5377859297,3.5501942833  
H,0,-1.1303973613,-4.5389914027,1.6472242603  
H,0,-0.7339622358,-2.2739000176,5.2829818152  
H,0,-1.2152483175,-4.4225701807,4.129642462  
O,0,2.2371053642,1.3436984321,0.6953166187  
O,0,2.4357360442,-1.0108809736,0.9578386904  
C,0,3.5666921042,1.0497536952,1.2018810916  
C,0,3.7691982708,-0.4662627946,0.7974040415  
C,0,4.5461387183,2.0282539687,0.5553489434  
H,0,5.5771817408,1.8057170206,0.8537730778  
H,0,4.480358563,2.0003011966,-0.5357807394  
H,0,4.3145245478,3.0474152831,0.8815345605  
C,0,3.5388904572,1.2520435122,2.7233791119  
H,0,3.1728240112,2.2600819898,2.9409130189  
H,0,2.8693055838,0.533661031,3.2058839175  
H,0,4.5338354638,1.1463096852,3.1684864897  
C,0,4.6992907863,-1.2608130134,1.7127876243  
H,0,5.7114965846,-0.840086321,1.7042707083  
H,0,4.332764448,-1.2709450701,2.7407295393  
H,0,4.7582973451,-2.2985099081,1.3681061647  
C,0,4.1968888585,-0.6410987293,-0.6687231332  
H,0,5.2331368567,-0.3240760517,-0.8296744968  
H,0,4.1137508963,-1.6996651681,-0.9365436812  
H,0,3.5554238604,-0.0646791559,-1.3455489034  
H,0,-0.1380243858,0.9438772486,1.7874288573

## The coordinates of TSs in hydroboration of benzophenone with HBPIn.

| TS1'                                         | TS2'                                         |
|----------------------------------------------|----------------------------------------------|
| <b>Frequency = -570.9i cm<sup>-1</sup></b>   | <b>Frequency = -1246.9i cm<sup>-1</sup></b>  |
| <b>ZeroPoint = 0.3826263 au</b>              | <b>ZeroPoint = 0.379817 au</b>               |
| <b>E<sub>tot</sub> = -988.3299502 au</b>     | <b>E<sub>tot</sub> = -988.2361821 au</b>     |
| C,0,0.0800094948,-0.0452270765,1.3332305934  | C,0,-0.017591777,-0.0397479059,1.3516532761  |
| B,0,1.5164590514,-0.0978806822,-0.1793508272 | B,0,1.5849792345,0.0452514223,0.6189759796   |
| H,0,1.8664990014,-0.0966268272,1.0770416579  | H,0,1.2838695413,-0.1496830536,-0.658838541  |
| O,0,-0.0185441367,-0.0031601352,0.0209233408 | O,0,-0.009816663,-0.0455003427,-0.0076831572 |
| C,0,-0.0371647505,-1.3648392381,2.000935004  | C,0,-0.3718305878,-1.3370524222,2.0063250604 |
| C,0,0.4316335776,-1.6015998883,3.3058856074  | C,0,-0.2143229124,-2.5463959546,1.3053304211 |
| C,0,-0.6150269486,-2.4171598747,1.2726846019 | C,0,-0.9074710949,-1.3885283955,3.3044422403 |
| C,0,0.29809203,-2.8628617364,3.8772785207    | C,0,-0.5693175152,-3.7600934477,1.885996027  |
| H,0,0.9339873263,-0.8093660662,3.8518225729  | H,0,0.1884263576,-2.5304517087,0.2997867238  |
| C,0,-0.7642499942,-3.672540345,1.8574579875  | C,0,-1.2619775818,-2.6074285573,3.8826896768 |
| H,0,-0.9352964496,-2.2289303772,0.2544949388 | H,0,-1.0747495858,-0.4729286786,3.8595035929 |
| C,0,-0.3104788911,-3.8970978909,3.1584453532 | C,0,-1.0925470451,-3.8001239558,3.1804864608 |
| H,0,0.6754443986,-3.0442840832,4.8796367653  | H,0,-0.4372740802,-4.6801115226,1.3224820054 |
| H,0,-1.2230312246,-4.4791477086,1.2929011606 | H,0,-1.6812378942,-2.6182608581,4.8854948353 |
| H,0,-0.4171731033,-4.880006522,3.6094744466  | H,0,-1.3698404616,-4.748678575,3.6323073204  |
| C,0,-0.134798415,1.2249471275,2.069335463    | C,0,-0.3142666389,1.285646986,1.9775670275   |
| C,0,-0.7914907174,1.268781172,3.312691148    | C,0,0.2023628055,1.6250050053,3.2385024265   |
| C,0,0.241494941,2.4317210261,1.4456550451    | C,0,-1.1022715404,2.2269074244,1.2969609188  |
| C,0,-1.0492228781,2.4924878547,3.9281490999  | C,0,-0.084203037,2.8614867102,3.8148001726   |
| H,0,-1.1366958866,0.353695857,3.7794759251   | H,0,0.8397806548,0.9204656708,3.7640148069   |
| C,0,-0.0028143451,3.6462203164,2.0755579578  | C,0,-1.3822449067,3.4651698525,1.8712245394  |
| H,0,0.7445740026,2.394056207,0.4845144914    | H,0,-1.4951624819,1.9791303212,0.315953435   |
| C,0,-0.6479383347,3.6806342571,3.3165177117  | C,0,-0.8783787685,3.7859621757,3.133678372   |
| H,0,-1.5700798466,2.5163479592,4.8811057448  | H,0,0.3232373983,3.1070182281,4.7919576034   |
| H,0,0.3059675169,4.5713066416,1.5972489076   | H,0,-2.0004692064,4.1796072381,1.3340221835  |
| H,0,-0.8439739013,4.6335701536,3.8009301504  | H,0,-1.1003137897,4.7507243859,3.5818988343  |
| O,0,2.0831725334,1.0527338154,-0.8161062301  | O,0,2.2723357711,1.2799472805,0.6603709527   |
| O,0,1.8826747888,-1.2780773641,-0.8814225829 | O,0,2.4098323917,-1.0653058071,0.9477754509  |
| C,0,2.9677532787,-0.9157795675,-1.754075704  | C,0,3.6531788586,0.9500722021,0.9608679782   |
| C,0,2.6561072472,0.6014167371,-2.0604345116  | C,0,3.7444051463,-0.5966817485,0.6254610614  |
| C,0,3.8791300048,1.4651799223,-2.3697870159  | C,0,4.5522884665,1.848123319,0.1111171947    |
| H,0,3.5658545841,2.5003030296,-2.5453939222  | H,0,5.610789136,1.6091796076,0.2681709164    |
| H,0,4.5876537113,1.4660255579,-1.5379989741  | H,0,4.3256542562,1.753343616,-0.9534295421   |
| H,0,4.3952228277,1.1118787108,-3.2706390788  | H,0,4.3960724459,2.8939205587,0.3950034265   |
| C,0,4.2909580222,-1.1099297621,-0.9939483764 | C,0,3.8745212292,1.244925362,2.4517442984    |
| H,0,4.3547926124,-0.4364786217,-0.133564971  | H,0,3.5733269973,2.2769110615,2.6547758631   |
| H,0,4.3344745708,-2.1390162022,-0.6223186084 | H,0,3.2687043474,0.5840282676,3.078597374    |
| H,0,5.1632763837,-0.9382756299,-1.6348535949 | H,0,4.9256572594,1.1270886673,2.7380109148   |

|                                              |                                              |
|----------------------------------------------|----------------------------------------------|
| C,0,2.9293770101,-1.8416890737,-2.9711068271 | C,0,4.7253693772,-1.388028135,1.4902890721   |
| H,0,1.9487876934,-1.8257573156,-3.4526645201 | H,0,5.7484283061,-1.0160464364,1.3622913634  |
| H,0,3.6889544694,-1.5571844553,-3.7092014737 | H,0,4.4601237553,-1.3323913387,2.5479634573  |
| H,0,3.1329353953,-2.8709459891,-2.6561931243 | H,0,4.7075986935,-2.4419088797,1.1942773072  |
| C,0,1.5968809607,0.7772744286,-3.1613063635  | C,0,4.0182631564,-0.8784756558,-0.8594974351 |
| H,0,1.2610818481,1.8195106098,-3.1640043678  | H,0,5.0433679638,-0.6153290496,-1.1403091387 |
| H,0,1.9932499581,0.5420178107,-4.1559355154  | H,0,3.8716703703,-1.9462383676,-1.0506222978 |
| H,0,0.7270438525,0.1413688985,-2.9718522063  | H,0,3.3374412979,-0.3209675359,-1.5130236089 |

$F_X = 50 (10^{-4})$  au

**TS1'**

**Frequency = -631.1i cm<sup>-1</sup>**

**ZeroPoint = 0.3823487 au**

**E<sub>tot</sub> = -988.3367626 au**

C,0,-0.0144310565,-0.0006187433,1.2842658252  
 B,0,1.5005260758,-0.0873850132,-0.1057907956  
 H,0,1.7244772881,-0.0470728205,1.1988822053  
 O,0,-0.0065606546,-0.0017954386,-0.0465981758  
 C,0,-0.2322256101,-1.2997372317,1.969260313  
 C,0,0.1624945095,-1.5316254165,3.298639945  
 C,0,-0.8680626888,-2.3219389388,1.2478053635  
 C,0,-0.0993877966,-2.7579998124,3.9003447384  
 H,0,0.6947999814,-0.7588869118,3.8453673515  
 C,0,-1.1497628222,-3.5400929871,1.8638816539  
 H,0,-1.1466676712,-2.1386196943,0.2165508057  
 C,0,-0.76858231,-3.759530454,3.1882850881  
 H,0,0.2107985958,-2.9340043709,4.9266579824  
 H,0,-1.6682713494,-4.3166517294,1.3095787476  
 H,0,-0.9905861575,-4.7092722361,3.6669970089  
 C,0,-0.3184941377,1.2865263594,1.9535469953  
 C,0,-1.0422958583,1.3497165123,3.1593642629  
 C,0,0.026537136,2.4844278475,1.2949711748  
 C,0,-1.3997649131,2.5831989959,3.7006492593  
 H,0,-1.3712623856,0.4408058689,3.6484636026  
 C,0,-0.321826394,3.709716864,1.8491621149  
 H,0,0.575953479,2.4323528478,0.3611162018  
 C,0,-1.0364832884,3.7633257443,3.0512224588  
 H,0,-1.9815629559,2.6198522166,4.6168075723  
 H,0,-0.0522267294,4.6287549801,1.3364948146  
 H,0,-1.3253655817,4.7233446896,3.4703030626  
 O,0,2.1516225677,1.048039355,-0.7032875001  
 O,0,1.9697010221,-1.2842274168,-0.7268757299  
 C,0,3.0792401537,-0.9287551266,-1.558817595

**TS2'**

**Frequency = -1261.2i cm<sup>-1</sup>**

**ZeroPoint = 0.3796919 au**

**E<sub>tot</sub> = -988.2368249 au**

C,0,0.0268083607,-0.0129663904,1.346849035  
 B,0,1.6125528209,0.0557700469,0.6428162826  
 H,0,1.3400299065,-0.1222330163,-0.6411426023  
 O,0,0.0385689729,-0.014888955,-0.0151645731  
 C,0,-0.3437726903,-1.3122397851,1.9953151676  
 C,0,-0.2834715281,-2.5090014103,1.2599130135  
 C,0,-0.8022379953,-1.3659534195,3.321861246  
 C,0,-0.6691145578,-3.7168880186,1.833400463  
 H,0,0.0495099109,-2.4850047784,0.228762159  
 C,0,-1.1873046159,-2.5790038857,3.8925296696  
 H,0,-0.8984436797,-0.4555767648,3.9017052347  
 C,0,-1.1217538992,-3.7602435852,3.1541922159  
 H,0,-0.6319617199,-4.6268111338,1.2402577165  
 H,0,-1.5612174835,-2.5926830298,4.9126400111  
 H,0,-1.4385930347,-4.7010620389,3.5954387534  
 C,0,-0.3122839846,1.3085178797,1.9660060752  
 C,0,0.2436229104,1.7007193803,3.1935373246  
 C,0,-1.2097214275,2.1732583404,1.320952338  
 C,0,-0.1103548761,2.916910529,3.7753158132  
 H,0,0.9527523027,1.0472981479,3.6933719958  
 C,0,-1.5592519682,3.3909797873,1.9016254402  
 H,0,-1.6452786901,1.8785193026,0.3714328521  
 C,0,-1.0143175839,3.7649536729,3.1319938208  
 H,0,0.3180771331,3.2022806327,4.7327070567  
 H,0,-2.2720297885,4.0404404114,1.4015463312  
 H,0,-1.3003749484,4.7076569239,3.590105676  
 O,0,2.3327609352,1.2847252008,0.6969890731  
 O,0,2.4428848433,-1.0631000714,0.9715568206  
 C,0,3.7013685746,0.9351486328,0.9786465366

|                                              |                                              |
|----------------------------------------------|----------------------------------------------|
| C,0,2.7659312298,0.5765431621,-1.9137389494  | C,0,3.7696737782,-0.6129444595,0.6394656132  |
| C,0,3.9911086145,1.4464524434,-2.2028743582  | C,0,4.6069436183,1.8239561479,0.122238679    |
| H,0,3.6707708633,2.4731801965,-2.4120451692  | H,0,5.6653294956,1.572145205,0.2685797972    |
| H,0,4.6714434976,1.4745235333,-1.3473265457  | H,0,4.3673348644,1.7338013764,-0.9399786762  |
| H,0,4.5394907942,1.0786566734,-3.0794710652  | H,0,4.4631777032,2.8712311342,0.4082727532   |
| C,0,4.3726633817,-1.0877367078,-0.737749591  | C,0,3.9472741538,1.2222100676,2.469048018    |
| H,0,4.3875009748,-0.3900988672,0.1056570064  | H,0,3.6559480853,2.2556908493,2.6791456583   |
| H,0,4.4083341439,-2.1063870752,-0.3366505932 | H,0,3.3397253949,0.5661735506,3.0989353717   |
| H,0,5.271730549,-0.9227137815,-1.345047429   | H,0,5.0011827079,1.0925003264,2.7449252146   |
| C,0,3.1063629496,-1.8836010579,-2.7548509072 | C,0,4.7508727116,-1.4190730515,1.4932100739  |
| H,0,2.1476687377,-1.8907690967,-3.2779254108 | H,0,5.779289278,-1.0622286399,1.3553394521   |
| H,0,3.8939917382,-1.6068876122,-3.4674280472 | H,0,4.4952248151,-1.3608463004,2.5531881927  |
| H,0,3.303969238,-2.9039366284,-2.4075047631  | H,0,4.7114950669,-2.4727495877,1.1971352248  |
| C,0,1.7472184308,0.7136401995,-3.0587067642  | C,0,4.0351213593,-0.8943618139,-0.8495266085 |
| H,0,1.3994446725,1.7508422741,-3.0992081066  | H,0,5.0637874376,-0.6467111975,-1.1358186747 |
| H,0,2.1811955233,0.4579636451,-4.0326852019  | H,0,3.8675022511,-1.958865006,-1.042480228   |
| H,0,0.8760500529,0.0753651602,-2.8870504966  | H,0,3.3590570794,-0.3258962067,-1.4974778078 |

$F_X = -50 (10^{-4}) \text{ au}$

**TS1'**

**Frequency = -566.5i cm<sup>-1</sup>**

**ZeroPoint = 0.3824617 au**

**E<sub>tot</sub> = -988.3298258 au**

|                                              |
|----------------------------------------------|
| C,0,0.0223169236,-0.0140718785,1.3032016318  |
| B,0,1.5992801745,-0.0816415628,-0.0990333192 |
| H,0,1.8531238763,-0.0811838602,1.16245322    |
| O,0,-0.0052461923,0.02437308,0.0008874746    |
| C,0,-0.103475146,-1.3303288,1.9805596115     |
| C,0,0.2900633627,-1.5405159712,3.3144652584  |
| C,0,-0.5790887051,-2.4120289155,1.2222141961 |
| C,0,0.1838351017,-2.8062621967,3.8828211335  |
| H,0,0.727291233,-0.727193559,3.8843401731    |
| C,0,-0.7001228697,-3.6726096157,1.8014972932 |
| H,0,-0.8258485765,-2.2431237839,0.1802671258 |
| C,0,-0.3203990313,-3.8718166975,3.1305264479 |
| H,0,0.5163802647,-2.9685825272,4.9039998998  |
| H,0,-1.0639037338,-4.506767525,1.2077795863  |
| H,0,-0.3908202135,-4.8614462825,3.5742877477 |
| C,0,-0.2081198326,1.2631038881,2.030735158   |
| C,0,-0.9520413208,1.3247362864,3.2218960994  |
| C,0,0.263905366,2.4561182127,1.4487405416    |
| C,0,-1.2038618468,2.5540158084,3.8294656032  |
| H,0,-1.3544611618,0.4174083352,3.6585240147  |
| C,0,0.0282074202,3.6755258075,2.0741806689   |

**TS2'**

**Frequency = -1235.1i cm<sup>-1</sup>**

**ZeroPoint = 0.3795164 au**

**E<sub>tot</sub> = -988.2430786 au**

|                                              |
|----------------------------------------------|
| C,0,-0.0539675231,-0.0575560461,1.354436919  |
| B,0,1.5760983654,0.0412467061,0.5979252973   |
| H,0,1.2431501913,-0.1682905068,-0.6730133136 |
| O,0,-0.0412728899,-0.064752042,-0.0029957161 |
| C,0,-0.3964216172,-1.3520334279,2.0119926156 |
| C,0,-0.1725435511,-2.5684523816,1.3397756756 |
| C,0,-0.9865331303,-1.4039514996,3.2875154096 |
| C,0,-0.5100292651,-3.7840120143,1.9270083045 |
| H,0,0.2851960291,-2.5569727723,0.3583918499  |
| C,0,-1.3234075802,-2.62468199,3.8722486794   |
| H,0,-1.1974342673,-0.4856277701,3.8233830884 |
| C,0,-1.0848846762,-3.8227220416,3.1996268689 |
| H,0,-0.3094774895,-4.7079248028,1.3906190547 |
| H,0,-1.771960268,-2.6335396668,4.8630134769  |
| H,0,-1.3339317087,-4.7743524601,3.6620644443 |
| C,0,-0.3207191721,1.2683085184,1.9855176154  |
| C,0,0.1686637317,1.5748292249,3.2665307084   |
| C,0,-1.0350015714,2.2557055553,1.2877095623  |
| C,0,-0.0727088028,2.8211037903,3.8425981358  |
| H,0,0.7619931552,0.8411135655,3.8031440605   |
| C,0,-1.2691070374,3.5033854204,1.8616328453  |

|                                              |                                              |
|----------------------------------------------|----------------------------------------------|
| H,0,0.8419371999,2.4030218287,0.5307190405   | H,0,-1.3941029472,2.0383496036,0.2865671675  |
| C,0,-0.7049422383,3.7283011718,3.2640200639  | C,0,-0.7935982486,3.7907592867,3.1431349539  |
| H,0,-1.782500769,2.5921691318,4.7486950682   | H,0,0.32551805,3.042247374,4.829209361       |
| H,0,0.4237978126,4.5877703391,1.6370971113   | H,0,-1.8189969962,4.2574352342,1.3032791066  |
| H,0,-0.8827247137,4.6842156962,3.7500948266  | H,0,-0.9678052244,4.7676840835,3.5866502375  |
| O,0,2.1747946551,1.0698242246,-0.7034254721  | O,0,2.2343873328,1.2781792335,0.6323868723   |
| O,0,1.9695187276,-1.2592210548,-0.7859899623 | O,0,2.3888071998,-1.0653046686,0.9260223317  |
| C,0,3.1404546409,-0.9056934778,-1.5607684396 | C,0,3.6283897591,0.9616087429,0.9459505864   |
| C,0,2.8707727717,0.6149474449,-1.8905473729  | C,0,3.734749548,-0.5842286146,0.6133980016   |
| C,0,4.1235954248,1.4702270418,-2.0718203083  | C,0,4.5211483202,1.8651740328,0.0987583103   |
| H,0,3.8385517739,2.507513711,-2.2793804289   | H,0,5.5797515559,1.6348566167,0.2617024716   |
| H,0,4.7447986067,1.4679171022,-1.1735660992  | H,0,4.3026743263,1.7664577868,-0.9670159079  |
| H,0,4.7281564264,1.1136874414,-2.9137468326  | H,0,4.3582182008,2.9101179606,0.3810477865   |
| C,0,4.3854349758,-1.116109487,-0.685212823   | C,0,3.8312421122,1.2633671712,2.4361399348   |
| H,0,4.381398871,-0.4507505111,0.1837394418   | H,0,3.5275438064,2.2958863209,2.6323796053   |
| H,0,4.3896250176,-2.1481301504,-0.3202944281 | H,0,3.2247547007,0.6015669529,3.0619954632   |
| H,0,5.3122329282,-0.9476569423,-1.2432061682 | H,0,4.8799173225,1.151060334,2.7298131061    |
| C,0,3.2024793808,-1.8295845843,-2.7769514505 | C,0,4.7118051314,-1.3662907276,1.488407366   |
| H,0,2.2700443296,-1.8074246913,-3.3471526107 | H,0,5.731837003,-0.9859634802,1.3676094628   |
| H,0,4.0285174828,-1.5496160227,-3.4406009016 | H,0,4.4397342084,-1.3105335823,2.5442579779  |
| H,0,3.373184446,-2.8595980349,-2.4465896312  | H,0,4.7086753627,-2.4201701453,1.1933349551  |
| C,0,1.9241998411,0.8048833741,-3.0864725739  | C,0,4.0144405087,-0.8680662228,-0.867736697  |
| H,0,1.6042119803,1.8518777805,-3.1192628996  | H,0,5.0368866055,-0.5939061006,-1.1445229735 |
| H,0,2.4145695546,0.5672539583,-4.0371997379  | H,0,3.8844657321,-1.9382413099,-1.0562384673 |
| H,0,1.0330295011,0.1774722677,-2.9840901679  | H,0,3.330247708,-0.3193142415,-1.5262935943  |

$F_Y = 50 (10^{-4}) \text{ au}$

**TS1'**

**Frequency = -564.4i cm<sup>-1</sup>**

**ZeroPoint = 0.3825564 au**

**E<sub>tot</sub> = -988.3345125 au**

|                                              |
|----------------------------------------------|
| C,0,0.0758119432,-0.0284674774,1.3425453416  |
| B,0,1.4882157123,-0.0414565989,-0.1908841632 |
| H,0,1.8606356707,-0.0117872705,1.059258953   |
| O,0,-0.0413871632,0.0566889254,0.0325494963  |
| C,0,-0.0322088835,-1.3488573661,1.9845230532 |
| C,0,0.3869620175,-1.5860203601,3.3097089549  |
| C,0,-0.5357448519,-2.4161475833,1.2176632364 |
| C,0,0.2769986476,-2.8578147919,3.8586109038  |
| H,0,0.8390787117,-0.7855052208,3.88685578    |
| C,0,-0.6620606826,-3.6826664575,1.7809319412 |
| H,0,-0.8172170264,-2.2302854541,0.1879712039 |
| C,0,-0.2581123178,-3.9054725827,3.0993477373 |

**TS2'**

**Frequency = -1252.4i cm<sup>-1</sup>**

**ZeroPoint = 0.3797037 au**

**E<sub>tot</sub> = -988.239422 au**

|                                               |
|-----------------------------------------------|
| C,0,-0.018170983,-0.0331817351,1.3488757271   |
| B,0,1.5848920353,0.0561720975,0.6306381743    |
| H,0,1.2971679176,-0.1675459848,-0.6453573365  |
| O,0,-0.0028512818,-0.0182178254,-0.0107102925 |
| C,0,-0.3766679833,-1.3329690628,1.9959462823  |
| C,0,-0.2303863584,-2.5348372603,1.2795460184  |
| C,0,-0.8940407333,-1.3954433214,3.3011852165  |
| C,0,-0.5770702638,-3.7542302119,1.8531425841  |
| H,0,0.157633349,-2.5119935883,0.2682473353    |
| C,0,-1.2412412682,-2.6200448224,3.8715512494  |
| H,0,-1.0553970852,-0.4866119025,3.8697432941  |
| C,0,-1.0808603811,-3.8056726589,3.1549860517  |

|                                              |                                              |
|----------------------------------------------|----------------------------------------------|
| H,0,0.617925079,-3.0421004288,4.8730842231   | H,0,-0.45331706,-4.6692243193,1.2811280492   |
| H,0,-1.060535127,-4.5007367965,1.1889058467  | H,0,-1.6458242008,-2.6437096085,4.8798766958 |
| H,0,-0.3441383009,-4.8979498037,3.5322303074 | H,0,-1.3492656965,-4.7586979131,3.601086587  |
| C,0,-0.1254331988,1.2415391757,2.1037444332  | C,0,-0.3147340988,1.2910431995,1.9800264622  |
| C,0,-0.8399240322,1.2809395523,3.3116547276  | C,0,0.1930642093,1.6250713717,3.2457709724   |
| C,0,0.3131900468,2.447424693,1.5242450673    | C,0,-1.1005734923,2.2360083599,1.3020557542  |
| C,0,-1.0910566977,2.5005884914,3.942384377   | C,0,-0.0994836494,2.8575648888,3.8280675254  |
| H,0,-1.2289717959,0.365665913,3.7422726618   | H,0,0.8245300489,0.9162675475,3.7718369648   |
| C,0,0.074397653,3.6565757192,2.1673761422    | C,0,-1.387318406,3.470285833,1.8820800774    |
| H,0,0.8519380405,2.4142047613,0.581884386    | H,0,-1.4898280703,1.9900576438,0.3191983645  |
| C,0,-0.6272070797,3.6876322487,3.3775333233  | C,0,-0.8922825299,3.7851054292,3.149473616   |
| H,0,-1.6545972515,2.5172901109,4.8712151062  | H,0,0.2993148764,3.0937635981,4.8115072842   |
| H,0,0.4326735375,4.5809409472,1.7208813651   | H,0,-2.0095879733,4.1834669047,1.3460424982  |
| H,0,-0.8179119673,4.6368070811,3.8735147156  | H,0,-1.124023499,4.7448446633,3.6059996247   |
| O,0,2.0474809193,1.0942192809,-0.8713987925  | O,0,2.2780827068,1.2943886507,0.6609755694   |
| O,0,1.8413947116,-1.2372830101,-0.8637067758 | O,0,2.4062111208,-1.0462366469,0.9827161242  |
| C,0,2.9381370448,-0.9133956844,-1.7350613787 | C,0,3.6587008088,0.9567504597,0.9540090328   |
| C,0,2.6310956697,0.5936707391,-2.0939304482  | C,0,3.7416235061,-0.5968732294,0.6442569574  |
| C,0,3.8602106229,1.4412496924,-2.4248229177  | C,0,4.5573305078,1.834255465,0.081469964     |
| H,0,3.5533836676,2.4718243,-2.6414473537     | H,0,5.6151343902,1.5894002059,0.2339173519   |
| H,0,4.5621145486,1.4660383689,-1.5876243441  | H,0,4.3218319483,1.7190229403,-0.9792087504  |
| H,0,4.3815445215,1.0508186582,-3.3070324343  | H,0,4.4099738849,2.8871862808,0.3476129939   |
| C,0,4.2525316042,-1.0849866127,-0.9542102038 | C,0,3.8953367946,1.2756253185,2.4377692578   |
| H,0,4.3128659367,-0.3829165795,-0.1160846114 | H,0,3.6025413956,2.3137112673,2.6266941697   |
| H,0,4.2871630923,-2.1001309787,-0.5472449407 | H,0,3.2898347629,0.6288670038,3.0788648073   |
| H,0,5.1319600991,-0.9431246296,-1.5927144209 | H,0,4.9472506527,1.1518247296,2.7186989456   |
| C,0,2.9100627515,-1.8822893923,-2.9178243619 | C,0,4.7205720026,-1.3801292475,1.5188522351  |
| H,0,1.9346202853,-1.8859881134,-3.4098926905 | H,0,5.7464389191,-1.0197372743,1.3793353443  |
| H,0,3.6784326659,-1.628185065,-3.6578707644  | H,0,4.4606320345,-1.3070661556,2.5767734969  |
| H,0,3.1083420954,-2.8987873298,-2.5635937584 | H,0,4.6935884572,-2.4380793192,1.2416119672  |
| C,0,1.5814769503,0.7317884747,-3.2090478178  | C,0,4.0066094723,-0.9081300258,-0.8361262965 |
| H,0,1.2453116889,1.7740758917,-3.2518016059  | H,0,5.0333506764,-0.6617347259,-1.1266008359 |
| H,0,1.9846346474,0.4578978226,-4.1908316988  | H,0,3.8508384884,-1.977561587,-1.0053100819  |
| H,0,0.7114807938,0.1020907397,-3.0026328018  | H,0,3.3268320482,-0.3592004325,-1.4988940326 |

$F_Y = -50 (10^{-4}) \text{ au}$

**TS1'**

**Frequency = -574.9i cm<sup>-1</sup>**

**ZeroPoint = 0.3823655 au**

**E<sub>tot</sub> = -988.3343986 au**

C,0,0.0790005878,-0.0656699375,1.3284747757  
 B,0,1.5175408024,-0.1556367721,-0.1844919398  
 H,0,1.8602685229,-0.1876992545,1.0777261053

**TS2'**

**Frequency = -1251.1i cm<sup>-1</sup>**

**ZeroPoint = 0.3796682 au**

**E<sub>tot</sub> = -988.2408982 au**

C,0,-0.0252100356,-0.0531588869,1.3600003913  
 B,0,1.5773264698,0.0326365224,0.6125411403  
 H,0,1.2594312075,-0.143566947,-0.6660047236

|                                              |                                               |
|----------------------------------------------|-----------------------------------------------|
| O,0,-0.0115007977,-0.0684964305,0.0121992413 | O,0,-0.0230661599,-0.0787039484,-0.0004943693 |
| C,0,-0.0458285518,-1.382317165,2.0216479371  | C,0,-0.3734886076,-1.3493377285,2.0182448992  |
| C,0,0.4777542995,-1.6242055552,3.3022697193  | C,0,-0.1972240556,-2.5648118026,1.3311083606  |
| C,0,-0.6957098127,-2.4183543176,1.3357498218 | C,0,-0.9319616572,-1.3962637217,3.3073872875  |
| C,0,0.3292211307,-2.8759704969,3.8935304917  | C,0,-0.5559425086,-3.7760330356,1.9149345451  |
| H,0,1.0290098944,-0.8425874509,3.8151495311  | H,0,0.2233472085,-2.551868152,0.3329325615    |
| C,0,-0.8584224481,-3.6641933057,1.9391267249 | C,0,-1.2895214343,-2.6125677782,3.8892876538  |
| H,0,-1.0594002117,-2.2249110423,0.3329432016 | H,0,-1.1122743892,-0.4759466693,3.8500618642  |
| C,0,-0.3485533132,-3.8951497794,3.2176589056 | C,0,-1.1023466353,-3.8105969259,3.2002417352  |
| H,0,0.7471015533,-3.0576044489,4.8800720842  | H,0,-0.4088887192,-4.6995278734,1.3585369926  |
| H,0,-1.3756217246,-4.4571591757,1.404747407  | H,0,-1.7271994025,-2.6149649587,4.8845594973  |
| H,0,-0.4683567732,-4.8698604207,3.6852436958 | H,0,-1.384796848,-4.757479246,3.6549916909    |
| C,0,-0.143569526,1.2057471949,2.0361972595   | C,0,-0.314983482,1.2741421243,1.9808910524    |
| C,0,-0.7283686023,1.2641073335,3.3185994872  | C,0,0.1991720541,1.6090391363,3.2450973692    |
| C,0,0.1614170711,2.4091721073,1.3630061281   | C,0,-1.0769612526,2.2283026638,1.2874121611   |
| C,0,-0.9873198301,2.494041693,3.9153999576   | C,0,-0.0645337493,2.8549957904,3.8113638176   |
| H,0,-1.0220322524,0.3534860187,3.827785597   | H,0,0.8226592866,0.8970190776,3.7783372195    |
| C,0,-0.0842700244,3.6318014239,1.9753991779  | C,0,-1.3323842193,3.476120908,1.8517886676    |
| H,0,0.6187773657,2.3619007276,0.380484723    | H,0,-1.4642860094,1.9871809066,0.3025225983   |
| C,0,-0.6585945098,3.6782449826,3.2504385959  | C,0,-0.8305857632,3.7932499591,3.1163913521   |
| H,0,-1.4536273627,2.5317477811,4.8955053018  | H,0,0.3427731503,3.1014532116,4.7879950682    |
| H,0,0.1683790901,4.5534874406,1.4604078373   | H,0,-1.9241940745,4.204305131,1.3046560152    |
| H,0,-0.8556797823,4.6371713183,3.7212227023  | H,0,-1.028649408,4.7677685576,3.5529712224    |
| O,0,2.0895131098,1.0105924183,-0.7763801904  | O,0,2.2550191574,1.2657229854,0.6551675861    |
| O,0,1.8976320698,-1.3168952736,-0.9205957185 | O,0,2.4100247344,-1.0809322203,0.9221274014   |
| C,0,2.9844956471,-0.9162367745,-1.7755307193 | C,0,3.6378102303,0.95088185,0.9628048873      |
| C,0,2.674361716,0.6109084283,-2.0305843461   | C,0,3.74200358,-0.5913505594,0.6119709763     |
| C,0,3.8971893722,1.4895121802,-2.2950552517  | C,0,4.5320094683,1.8666760152,0.1278674412    |
| H,0,3.5812579246,2.5286504461,-2.43237827    | H,0,5.5922734132,1.6383646087,0.2889421993    |
| H,0,4.5985479371,1.4643402408,-1.4576383573  | H,0,4.311982523,1.7844646085,-0.9390413373    |
| H,0,4.4230140206,1.176293123,-3.2051829925   | H,0,4.3641061926,2.9068782106,0.4223534807    |
| C,0,4.3053418015,-1.1354763381,-1.0180989661 | C,0,3.8459555363,1.2326536681,2.457858593     |
| H,0,4.3604909391,-0.4948023956,-0.1330027377 | H,0,3.534745524,2.2594645313,2.6680398137     |
| H,0,4.3525132199,-2.1789530409,-0.6860094328 | H,0,3.2420430768,0.5613423004,3.0761210525    |
| H,0,5.1795694704,-0.9317850859,-1.6467579224 | H,0,4.8969789093,1.1248784515,2.7484020698    |
| C,0,2.9535330046,-1.7958972557,-3.0273809901 | C,0,4.7280201136,-1.3818884207,1.4717560105   |
| H,0,1.9751323087,-1.7594079417,-3.51231494   | H,0,5.7470438154,-0.997061492,1.3510721034    |
| H,0,3.7153855824,-1.4806584771,-3.7505167088 | H,0,4.4588647703,-1.3362864645,2.528982575    |
| H,0,3.1570242399,-2.8375887113,-2.751416984  | H,0,4.7217480708,-2.4340339465,1.1651765418   |
| C,0,1.6250984854,0.8270820611,-3.1340398622  | C,0,4.0240204674,-0.852629935,-0.875321214    |
| H,0,1.292570755,1.8691275604,-3.1031240926   | H,0,5.0455807598,-0.5700303483,-1.1493763393  |
| H,0,2.0308628707,0.629349782,-4.1331455971   | H,0,3.8915421833,-1.9205441284,-1.0809766429  |
| H,0,0.7504157304,0.1883685855,-2.9761053904  | H,0,3.3384085082,-0.2944010295,-1.5223202689  |



$F_Z = 50 (10^{-4}) \text{ au}$

**TS1'**

**Frequency = -639.6i cm<sup>-1</sup>**

**ZeroPoint = 0.3823621 au**

**E<sub>tot</sub> = -988.3265799 au**

C,0,-0.0010826314,0.0010701716,1.2671456341  
B,0,1.6078194211,-0.0953634858,-0.0511018606  
H,0,1.7790799321,-0.0421008705,1.2427510703  
O,0,0.0120250406,0.0066290714,-0.035939564  
C,0,-0.1838640099,-1.305589357,1.96335932  
C,0,0.162098252,-1.5121346716,3.309348728  
C,0,-0.6938671062,-2.3727634464,1.2092287664  
C,0,-0.0250510786,-2.7610583205,3.8940984512  
H,0,0.6140613166,-0.7060213774,3.8792475432  
C,0,-0.8956309512,-3.6171208827,1.8040647868  
H,0,-0.9143863917,-2.2083316601,0.1607961318  
C,0,-0.5641511778,-3.8126610874,3.1454023008  
H,0,0.2616347173,-2.9205642905,4.9307529181  
H,0,-1.2956321538,-4.436339909,1.2138867058  
H,0,-0.708696269,-4.7879582407,3.6034329999  
C,0,-0.2893310264,1.2964169231,1.94873031  
C,0,-1.0534491623,1.3784231175,3.1248059238  
C,0,0.1291269035,2.4809267419,1.3125108628  
C,0,-1.3799211475,2.6227873391,3.6631999529  
H,0,-1.4276371488,0.4757999046,3.5946370876  
C,0,-0.1856303654,3.7173457154,1.8657667127  
H,0,0.7134880357,2.4090204708,0.3999203679  
C,0,-0.9414359923,3.7918336163,3.0400217053  
H,0,-1.9904345792,2.6772690028,4.5611386803  
H,0,0.1477682048,4.6258621054,1.3727129413  
H,0,-1.1990820027,4.7615936833,3.4587112492  
O,0,2.2172297177,1.0344406285,-0.6516425936  
O,0,2.0276419742,-1.2986807566,-0.6519694906  
C,0,3.0945773992,-0.9509970371,-1.5694732702  
C,0,2.7738608673,0.5573443534,-1.9084184715  
C,0,3.9890210747,1.4183677985,-2.2466332688  
H,0,3.6696293006,2.4468654377,-2.4453339576  
H,0,4.7074571923,1.4398788142,-1.423274852  
H,0,4.494583132,1.0467336082,-3.1449782669  
C,0,4.4294875664,-1.1254159891,-0.8282689064  
H,0,4.5058595911,-0.4315706271,0.0155808024  
H,0,4.4833104496,-2.1471216419,-0.4376067698  
H,0,5.2881432543,-0.965423936,-1.4893464952  
C,0,3.0284545753,-1.9064534093,-2.7601444836

**TS2'**

**Frequency = -1213.6i cm<sup>-1</sup>**

**ZeroPoint = 0.3796657 au**

**E<sub>tot</sub> = -988.2383132 au**

C,0,-0.0261579357,-0.0521726482,1.370218462  
B,0,1.5871359122,0.04036842,0.6234188229  
H,0,1.2854143442,-0.1577734155,-0.6481984819  
O,0,-0.0073453266,-0.0603795818,0.0150186836  
C,0,-0.3761794749,-1.3490929176,2.0235628914  
C,0,-0.2021304615,-2.5574492196,1.3236454151  
C,0,-0.9326244906,-1.4061083782,3.3130669488  
C,0,-0.5613840392,-3.7738036506,1.8958134548  
H,0,0.2116660095,-2.5389057725,0.3230116401  
C,0,-1.2912004048,-2.6279727088,3.8828004342  
H,0,-1.1178063527,-0.4905772852,3.8631377981  
C,0,-1.1056853574,-3.8189586678,3.1815623849  
H,0,-0.4210492076,-4.6901016132,1.3289046152  
H,0,-1.7329733458,-2.6417493606,4.8770260898  
H,0,-1.3918131942,-4.7702857317,3.6229420557  
C,0,-0.3162444664,1.2752989435,1.9921106157  
C,0,0.1719335487,1.6059432817,3.2668629576  
C,0,-1.0595737425,2.2350977853,1.2866832165  
C,0,-0.1018678257,2.8506959622,3.8319678447  
H,0,0.7834771458,0.8894884392,3.8073718325  
C,0,-1.3251516784,3.4816822189,1.8494683786  
H,0,-1.4242687155,1.998190006,0.2925710967  
C,0,-0.8522645772,3.7931119437,3.1261824232  
H,0,0.2885512326,3.0910848752,4.818403958  
H,0,-1.902967153,4.2107525271,1.2881103604  
H,0,-1.0594656779,4.7672940665,3.5619167615  
O,0,2.2615081845,1.2791956652,0.6765415917  
O,0,2.4139096704,-1.0630268398,0.9650079515  
C,0,3.6488356483,0.9581004679,0.9573429403  
C,0,3.7455204618,-0.5889595126,0.6232944497  
C,0,4.5332048316,1.8597724201,0.0973249419  
H,0,5.5946318368,1.6261874341,0.2421725712  
H,0,4.2969081662,1.7621600884,-0.9641117108  
H,0,4.374191738,2.9057504074,0.3791635128  
C,0,3.8804835314,1.2571915734,2.4469768583  
H,0,3.5765251372,2.2890485444,2.6480187228  
H,0,3.2803276087,0.5948958325,3.07889171  
H,0,4.9349198265,1.1441838926,2.7245941017  
C,0,4.7381175032,-1.3737112119,1.4810817618

|                                              |                                              |
|----------------------------------------------|----------------------------------------------|
| H,0,2.0383474981,-1.9032355057,-3.2208847772 | H,0,5.7576975248,-0.9969277102,1.3407880972  |
| H,0,3.7687777521,-1.6390357339,-3.522645342  | H,0,4.4823149821,-1.3174258257,2.5419127026  |
| H,0,3.2420711625,-2.9277356088,-2.4270161501 | H,0,4.7234217058,-2.4273984534,1.1848101544  |
| C,0,1.7008953585,0.7098531646,-2.996467007   | C,0,4.0057736817,-0.8727328671,-0.8622234685 |
| H,0,1.3682324547,1.7524216577,-3.0230392013  | H,0,5.0268503856,-0.6072587716,-1.1537826206 |
| H,0,2.0879384213,0.4523929799,-3.9878393683  | H,0,3.8608612062,-1.9404923038,-1.052655677  |
| H,0,0.8301286185,0.0809925191,-2.789927296   | H,0,3.3203636038,-0.3186753475,-1.5133662514 |

$F_z = -50 (10^{-4}) \text{ au}$

**TS1'**

**Frequency = -548.3i cm<sup>-1</sup>**

**ZeroPoint = 0.3824917 au**

**E<sub>tot</sub> = -988.3421223 au**

|                                              |
|----------------------------------------------|
| C,0,0.058770702,-0.0534705342,1.3225245216   |
| B,0,1.3840524402,-0.0880444598,-0.2765008625 |
| H,0,1.8099062638,-0.087100406,0.9601824817   |
| O,0,-0.099379566,-0.0154780824,-0.0012362451 |
| C,0,-0.0331388935,-1.3680579515,1.9929538744 |
| C,0,0.4982531093,-1.5996554508,3.2762066818  |
| C,0,-0.6640894716,-2.4195008346,1.3070393899 |
| C,0,0.3708942248,-2.8508315578,3.8702511269  |
| H,0,1.0382309525,-0.8108040956,3.7898813448  |
| C,0,-0.8069342825,-3.663497019,1.9158407662  |
| H,0,-1.0396044206,-2.2356872731,0.3069646266 |
| C,0,-0.2934842428,-3.8809158513,3.1964674269 |
| H,0,0.7893961035,-3.0255514781,4.8567395548  |
| H,0,-1.3145646367,-4.4674377536,1.3901243971 |
| H,0,-0.4014888039,-4.8529608972,3.6694057436 |
| C,0,-0.1362378807,1.2109163631,2.0634664807  |
| C,0,-0.7324371634,1.2405055814,3.3395316022  |
| C,0,0.2002097407,2.4282865044,1.4349435177   |
| C,0,-0.965492561,2.4555074187,3.9806791441   |
| H,0,-1.0494134739,0.320914467,3.8163096936   |
| C,0,-0.0198943977,3.6334878456,2.0892320274  |
| H,0,0.659469074,2.4070972197,0.4523021674    |
| C,0,-0.6008337159,3.651891655,3.3627755779   |
| H,0,-1.4326628168,2.4656634251,4.9606765183  |
| H,0,0.2641820218,4.566165064,1.6098977935    |
| H,0,-0.7714315966,4.5971515902,3.8704621828  |
| O,0,1.9299802512,1.068428251,-0.9480224572   |
| O,0,1.7646237759,-1.2630860663,-1.000207067  |
| C,0,2.9166353539,-0.9055175504,-1.7693351954 |
| C,0,2.6283891409,0.6102344438,-2.1110709273  |

**TS2'**

**Frequency = -1283.1i cm<sup>-1</sup>**

**ZeroPoint = 0.3797539 au**

**E<sub>tot</sub> = -988.2403623 au**

|                                               |
|-----------------------------------------------|
| C,0,-0.0097688753,-0.0236400923,1.3318793025  |
| B,0,1.5831049963,0.0507048734,0.6105039603    |
| H,0,1.2774202816,-0.1420294436,-0.6745900502  |
| O,0,-0.0140177788,-0.0278665487,-0.0321481806 |
| C,0,-0.3658037871,-1.3212325792,1.9890586333  |
| C,0,-0.2405514141,-2.5298425307,1.2808332964  |
| C,0,-0.8599734061,-1.3706090478,3.3035926548  |
| C,0,-0.5858248021,-3.741749862,1.8713907748   |
| H,0,0.1340977908,-2.5140904998,0.2638586955   |
| C,0,-1.2039793082,-2.5875662068,3.8920970812  |
| H,0,-0.9992820973,-0.4568621763,3.8686690748  |
| C,0,-1.0657473613,-3.7800313344,3.1826786573  |
| H,0,-0.4754063603,-4.6637087152,1.3055440514  |
| H,0,-1.5846580211,-2.5976906283,4.9094220207  |
| H,0,-1.3297333749,-4.7265505514,3.6457718108  |
| C,0,-0.3127547519,1.3005050172,1.9599719315   |
| C,0,0.2239185308,1.6492330808,3.2099700788    |
| C,0,-1.140212829,2.2228756519,1.3008688441    |
| C,0,-0.0816005759,2.8753283635,3.7985041833   |
| H,0,0.8853912831,0.958231801,3.7229603421     |
| C,0,-1.4393948249,3.4511262384,1.8869505297   |
| H,0,-1.5543975043,1.9643084768,0.3308789384   |
| C,0,-0.9156716022,3.7804272803,3.1393264058   |
| H,0,0.3349685322,3.1249221214,4.7700700301    |
| H,0,-2.0942282405,4.1494423635,1.3716059072   |
| H,0,-1.1575924502,4.7334376839,3.6013006692   |
| O,0,2.2854055115,1.2795194849,0.6380871768    |
| O,0,2.4036655359,-1.0683674781,0.9253517965   |
| C,0,3.6577923342,0.9390942743,0.9647665529    |
| C,0,3.7426461201,-0.6068143623,0.6262300575   |

|                                              |                                              |
|----------------------------------------------|----------------------------------------------|
| C,0,3.8733671385,1.4786927899,-2.3096051227  | C,0,4.5765790258,1.8334529135,0.1310152714   |
| H,0,3.5729901991,2.511940668,-2.5188317896   | H,0,5.6307624179,1.5869796714,0.3044909794   |
| H,0,4.4974377528,1.4901674124,-1.4131425775  | H,0,4.3644757312,1.743769048,-0.9379697437   |
| H,0,4.4788677556,1.1236614085,-3.1538395003  | H,0,4.4236179232,2.8787974602,0.4181675761   |
| C,0,4.1749106083,-1.0920994016,-0.9021228304 | C,0,3.8619518291,1.2270934886,2.4585521157   |
| H,0,4.1671304751,-0.4189225881,-0.0399844311 | H,0,3.563766992,2.2592107483,2.6640171999    |
| H,0,4.1903302941,-2.1191033103,-0.5231262732 | H,0,3.2468645694,0.5671884872,3.0764969646   |
| H,0,5.097658511,-0.9189862282,-1.4685045163  | H,0,4.9081300876,1.1026762045,2.7583577593   |
| C,0,2.9909910407,-1.8398454769,-2.9806496844 | C,0,4.7088036647,-1.4070331463,1.4993022142  |
| H,0,2.055291579,-1.8349276596,-3.5461641885  | H,0,5.7358459295,-1.0408833673,1.3865548586  |
| H,0,3.8123311848,-1.5559374288,-3.651201799  | H,0,4.4318676508,-1.3530811481,2.5534227747  |
| H,0,3.1713652846,-2.8651807107,-2.6394444024 | H,0,4.6873848517,-2.4606869422,1.2021031837  |
| C,0,1.6825013935,0.7723834504,-3.3158485263  | C,0,4.0329837386,-0.8849671287,-0.8581342943 |
| H,0,1.3426800044,1.8129650206,-3.3560329563  | H,0,5.0629023512,-0.624911154,-1.1258336738  |
| H,0,2.1737822681,0.5312039776,-4.2676184989  | H,0,3.8839851132,-1.9523478947,-1.0518989774 |
| H,0,0.8020242794,0.1329515094,-3.2011337905  | H,0,3.3586585732,-0.3222068947,-1.5146864351 |
